# Supplementary material for: Institutional Quality and Sustainable Development: Empirical Study in 10 Arab Countries
Source: Research Square preprint supplement (doi:10.21203/rs.3.rs-858770/v1), 2021-09-03
Supplement: Supplementary file 1 [file 0db2f570fece337109fcb056.xlsx]

## Sheet: Data
Country Name	Country Code	Series Name	Series Code	1996 [YR1996]	1998 [YR1998]	2000 [YR2000]	2002 [YR2002]	2003 [YR2003]	2004 [YR2004]	2005 [YR2005]	2006 [YR2006]	2007 [YR2007]	2008 [YR2008]	2009 [YR2009]	2010 [YR2010]	2011 [YR2011]	2012 [YR2012]	2013 [YR2013]	2014 [YR2014]	2015 [YR2015]	2016 [YR2016]	2017 [YR2017]	2018 [YR2018]	2019 [YR2019]
Algeria	DZA	Control of Corruption: Estimate	CC.EST	-0.566741	-0.88178	-0.937911	-0.875681	-0.692261	-0.679478	-0.482172	-0.521335	-0.559929	-0.594569	-0.577883	-0.52485	-0.544585	-0.503218	-0.473484	-0.600029	-0.645567	-0.677893	-0.601742	-0.630162	-0.62185
Algeria	DZA	Control of Corruption: Number of Sources	CC.NO.SRC	4	6	6	6	8	10	10	11	12	12	12	12	13	14	14	13	12	12	12	10	10
Algeria	DZA	Control of Corruption: Percentile Rank	CC.PER.RNK	33.3333	22.165	18.7817	23.2323	28.7879	27.8049	40	36.5854	34.466	33.0097	33.4928	36.6667	35.0711	37.4408	39.3365	32.2115	29.8077	27.8846	30.2885	28.3654	29.3269
Algeria	DZA	Control of Corruption: Percentile Rank, Lower Bound of 90% Confidence Interval	CC.PER.RNK.LOWER	16.6667	6.70103	4.56853	6.06061	13.1313	16.0976	23.9024	23.9024	20.3883	19.4175	20.0957	21.9048	22.2749	26.0663	26.0663	21.1538	18.75	15.3846	19.2308	17.3077	18.75
Algeria	DZA	Control of Corruption: Percentile Rank, Upper Bound of 90% Confidence Interval	CC.PER.RNK.UPPER	52.6882	35.0515	32.4873	33.8384	41.9192	40.9756	51.7073	46.8293	47.5728	44.1748	46.8899	48.0952	48.8152	48.8152	50.237	44.2308	42.3077	38.4615	42.7885	41.3462	41.3462
Algeria	DZA	Control of Corruption: Standard Error	CC.STD.ERR	0.262077	0.211729	0.220008	0.196195	0.17957	0.16454	0.165553	0.153358	0.157365	0.15742	0.164047	0.161168	0.153067	0.148437	0.149327	0.146637	0.146492	0.149603	0.136012	0.152032	0.165434
Algeria	DZA	Government Effectiveness: Estimate	GE.EST	-1.08877	-0.829002	-0.963841	-0.59752	-0.612373	-0.572631	-0.467568	-0.472641	-0.565725	-0.626527	-0.582937	-0.479542	-0.564616	-0.532319	-0.534195	-0.477553	-0.500881	-0.53116	-0.589159	-0.443925	-0.516175
Algeria	DZA	Government Effectiveness: Number of Sources	GE.NO.SRC	3	5	5	6	7	8	8	10	10	9	9	9	10	10	11	11	11	11	11	10	10
Algeria	DZA	Government Effectiveness: Percentile Rank	GE.PER.RNK	13.1148	19.6891	14.8718	31.1225	31.1225	34.4828	39.2157	38.0488	32.5243	31.068	35.4067	38.756	36.019	35.0711	35.0711	35.0962	35.5769	35.5769	30.7692	37.0192	33.6538
Algeria	DZA	Government Effectiveness: Percentile Rank, Lower Bound of 90% Confidence Interval	GE.PER.RNK.LOWER	6.01093	9.32643	5.64103	17.8571	17.3469	19.2118	26.4706	26.3415	17.9612	16.5049	19.6172	23.445	18.9574	21.327	22.7488	21.6346	20.6731	19.7115	18.2692	20.1923	17.3077
Algeria	DZA	Government Effectiveness: Percentile Rank, Upper Bound of 90% Confidence Interval	GE.PER.RNK.UPPER	21.8579	35.2332	29.2308	46.4286	44.898	46.798	49.0196	49.2683	46.1165	45.1456	47.3684	49.2823	46.4455	47.8673	46.4455	46.1538	47.1154	43.75	41.8269	48.0769	44.2308
Algeria	DZA	Government Effectiveness: Standard Error	GE.STD.ERR	0.173904	0.203155	0.211237	0.186934	0.177603	0.169681	0.171431	0.173147	0.193938	0.195716	0.191084	0.196098	0.193274	0.193598	0.174871	0.188385	0.181668	0.176562	0.184447	0.194295	0.203141
Algeria	DZA	Political Stability and Absence of Violence/Terrorism: Estimate	PV.EST	-1.78003	-1.87588	-1.43201	-1.63323	-1.75363	-1.35952	-0.915213	-1.12645	-1.14836	-1.09399	-1.19708	-1.25937	-1.36056	-1.32504	-1.20237	-1.19053	-1.09016	-1.09753	-0.915669	-0.826592	-1.00358
Algeria	DZA	Political Stability and Absence of Violence/Terrorism: Number of Sources	PV.NO.SRC	4	4	4	4	5	6	6	7	7	7	7	7	7	7	7	7	7	7	7	7	6
Algeria	DZA	Political Stability and Absence of Violence/Terrorism: Percentile Rank	PV.PER.RNK	5.31915	4.78723	10.0529	6.87831	5.52764	10.6796	20.3883	15.4589	14.0097	14.9039	13.2701	11.8483	10.4265	9.47867	12.7962	9.52381	11.9048	12.381	16.1905	18.0952	13.8095
Algeria	DZA	Political Stability and Absence of Violence/Terrorism: Percentile Rank, Lower Bound of 90% Confidence Interval	PV.PER.RNK.LOWER	2.12766	0	2.6455	1.0582	1.50754	4.36893	10.6796	8.21256	8.69565	9.61538	7.58294	4.73934	5.21327	5.6872	7.58294	8.09524	9.04762	8.57143	9.52381	11.4286	9.52381
Algeria	DZA	Political Stability and Absence of Violence/Terrorism: Percentile Rank, Upper Bound of 90% Confidence Interval	PV.PER.RNK.UPPER	12.234	10.6383	19.5767	17.4603	13.0653	18.932	32.5243	25.1208	22.2222	23.5577	19.9052	19.9052	18.4834	18.0095	19.9052	17.1429	21.4286	20	27.1429	29.0476	23.3333
Algeria	DZA	Political Stability and Absence of Violence/Terrorism: Standard Error	PV.STD.ERR	0.373857	0.345463	0.342809	0.316106	0.292475	0.287286	0.278669	0.253119	0.244181	0.246403	0.246402	0.243547	0.24425	0.226807	0.231508	0.200113	0.206815	0.212601	0.221237	0.219972	0.239387
Algeria	DZA	Regulatory Quality: Estimate	RQ.EST	-0.907437	-0.744814	-0.705386	-0.583472	-0.517234	-0.544126	-0.383399	-0.571554	-0.622034	-0.794614	-1.0738	-1.17103	-1.18957	-1.27687	-1.16597	-1.28296	-1.17361	-1.17188	-1.1963	-1.26254	-1.30338
Algeria	DZA	Regulatory Quality: Number of Sources	RQ.NO.SRC	4	6	6	7	8	9	9	10	10	9	9	9	9	9	9	9	9	9	9	8	8
Algeria	DZA	Regulatory Quality: Percentile Rank	RQ.PER.RNK	20.1087	22.7979	23.0769	29.5918	32.1429	30.0493	42.6471	29.4118	27.1845	21.3592	12.9187	9.56938	9.95261	9.00474	11.8483	8.17308	10.5769	10.0961	10.5769	8.17308	7.69231
Algeria	DZA	Regulatory Quality: Percentile Rank, Lower Bound of 90% Confidence Interval	RQ.PER.RNK.LOWER	7.06522	10.8808	13.3333	18.8775	20.4082	20.197	26.4706	20.098	18.4466	15.534	5.74163	5.26316	6.16114	2.8436	5.6872	4.32692	4.80769	5.28846	4.32692	4.32692	4.32692
Algeria	DZA	Regulatory Quality: Percentile Rank, Upper Bound of 90% Confidence Interval	RQ.PER.RNK.UPPER	36.413	37.8238	37.9487	44.898	47.449	46.3054	51.4706	44.6078	41.7476	34.466	23.445	19.6172	20.3791	18.4834	22.2749	16.8269	19.2308	18.2692	15.8654	14.4231	12.9808
Algeria	DZA	Regulatory Quality: Standard Error	RQ.STD.ERR	0.311746	0.269265	0.249092	0.211199	0.177445	0.174058	0.156505	0.174777	0.174263	0.1778	0.169315	0.170569	0.168605	0.188052	0.183056	0.186326	0.179034	0.182404	0.179166	0.19517	0.19501
Algeria	DZA	Rule of Law: Estimate	RL.EST	-1.21819	-1.16056	-1.21134	-0.630159	-0.587644	-0.620909	-0.750832	-0.708591	-0.772746	-0.741469	-0.793536	-0.784948	-0.807666	-0.772281	-0.689374	-0.773168	-0.863945	-0.857401	-0.863938	-0.775235	-0.815464
Algeria	DZA	Rule of Law: Number of Sources	RL.NO.SRC	6	8	8	9	10	13	13	15	16	15	15	15	16	16	16	14	14	13	13	12	12
Algeria	DZA	Rule of Law: Percentile Rank	RL.PER.RNK	12.5628	12.5	11.8812	33.1683	31.6832	33.4928	28.2297	27.7512	24.8804	25.4808	23.2228	26.5403	24.4132	26.7606	30.9859	24.0385	19.2308	18.75	19.2308	22.1154	20.6731
Algeria	DZA	Rule of Law: Percentile Rank, Lower Bound of 90% Confidence Interval	RL.PER.RNK.LOWER	4.52261	6	2.47525	18.8119	19.3069	18.6603	16.2679	18.6603	14.3541	16.8269	15.6398	15.6398	15.493	16.4319	19.2488	13.4615	11.5385	10.5769	10.0961	16.3462	12.5
Algeria	DZA	Rule of Law: Percentile Rank, Upper Bound of 90% Confidence Interval	RL.PER.RNK.UPPER	22.1105	23	21.7822	42.5743	44.5545	42.1053	37.799	39.7129	35.4067	36.5385	35.0711	34.1232	31.4554	35.2113	40.3756	33.1731	30.7692	31.25	30.7692	32.6923	31.25
Algeria	DZA	Rule of Law: Standard Error	RL.STD.ERR	0.212429	0.209898	0.175605	0.184595	0.1799	0.161742	0.156774	0.146618	0.146682	0.142793	0.139011	0.136988	0.130975	0.135326	0.133684	0.145414	0.14557	0.161385	0.152374	0.155365	0.159239
Algeria	DZA	Voice and Accountability: Estimate	VA.EST	-1.16629	-1.24434	-1.11005	-1.04466	-1.07672	-0.802059	-0.715686	-0.916875	-0.984122	-0.979712	-1.03843	-1.02234	-1.00412	-0.906027	-0.893353	-0.815198	-0.849065	-0.862889	-0.903749	-0.981677	-1.03768
Algeria	DZA	Voice and Accountability: Number of Sources	VA.NO.SRC	6	6	7	9	10	13	14	15	16	16	16	16	16	16	16	13	12	12	12	12	11
Algeria	DZA	Voice and Accountability: Percentile Rank	VA.PER.RNK	14.5	12.4378	14.4279	18.9055	18.9055	23.5577	25.4808	22.5962	20.1923	20.6731	17.5356	18.4834	20.1878	22.5352	23.9437	25.1231	24.6305	23.6453	23.1527	21.6749	20.197
Algeria	DZA	Voice and Accountability: Percentile Rank, Lower Bound of 90% Confidence Interval	VA.PER.RNK.LOWER	8	5.47264	8.95522	10.9453	9.95025	18.75	21.6346	17.7885	14.9039	14.9039	13.2701	13.2701	13.615	15.493	15.9624	21.1823	20.6897	19.2118	16.7488	13.7931	14.2857
Algeria	DZA	Voice and Accountability: Percentile Rank, Upper Bound of 90% Confidence Interval	VA.PER.RNK.UPPER	23	21.393	24.8756	26.3682	25.3731	29.8077	32.6923	26.9231	25	25.4808	24.1706	25.5924	25.8216	26.7606	26.7606	29.064	28.0788	28.0788	27.5862	25.6158	23.6453
Algeria	DZA	Voice and Accountability: Standard Error	VA.STD.ERR	0.20881	0.214446	0.197283	0.159149	0.156959	0.13771	0.138627	0.113918	0.111849	0.10955	0.11148	0.110139	0.113212	0.115555	0.110357	0.127327	0.126583	0.124542	0.124982	0.131568	0.124065
Bahrain	BHR	Control of Corruption: Estimate	CC.EST	0.328689	0.273106	0.380999	0.820579	0.399893	0.451451	0.390058	0.19403	0.180774	0.18894	0.185157	0.183213	0.217318	0.373842	0.433094	0.27883	0.138849	-0.0158624	-0.140962	-0.147291	-0.010218
Bahrain	BHR	Control of Corruption: Number of Sources	CC.NO.SRC	3	3	3	4	5	6	6	6	6	6	8	8	8	8	8	7	6	6	5	5	6
Bahrain	BHR	Control of Corruption: Percentile Rank	CC.PER.RNK	63.9785	63.9175	68.0203	79.2929	70.7071	70.2439	66.3415	61.4634	60.6796	62.1359	63.6364	63.3333	63.981	67.7725	68.7204	63.9423	61.0577	57.6923	51.9231	51.4423	56.7308
Bahrain	BHR	Control of Corruption: Percentile Rank, Lower Bound of 90% Confidence Interval	CC.PER.RNK.LOWER	50.5376	50.5155	54.8223	71.7172	58.5859	58.0488	58.0488	53.1707	52.9126	53.3981	55.5024	54.2857	55.9242	60.6635	62.5592	57.6923	53.3654	45.6731	42.3077	39.4231	44.2308
Bahrain	BHR	Control of Corruption: Percentile Rank, Upper Bound of 90% Confidence Interval	CC.PER.RNK.UPPER	77.4194	76.8041	79.1878	84.3434	76.7677	75.6098	73.1707	71.7073	72.3301	72.8155	71.2919	71.4286	70.6161	72.5118	73.9337	70.1923	66.8269	64.9039	59.6154	60.0962	63.4615
Bahrain	BHR	Control of Corruption: Standard Error	CC.STD.ERR	0.312212	0.265407	0.291996	0.210113	0.232526	0.199106	0.192708	0.206071	0.212609	0.208899	0.186846	0.183705	0.178855	0.174532	0.175228	0.168316	0.168374	0.176011	0.161465	0.178683	0.18624
Bahrain	BHR	Government Effectiveness: Estimate	GE.EST	0.77664	0.603047	0.588942	0.552828	0.481797	0.546102	0.396987	0.395685	0.408986	0.386813	0.480627	0.456938	0.520667	0.549759	0.588787	0.56504	0.559801	0.327843	0.193921	0.179877	0.298761
Bahrain	BHR	Government Effectiveness: Number of Sources	GE.NO.SRC	3	3	3	5	4	5	5	5	5	5	7	7	7	7	7	7	7	7	6	6	7
Bahrain	BHR	Government Effectiveness: Percentile Rank	GE.PER.RNK	77.0492	74.0933	72.8205	70.9184	68.8775	70.936	65.6863	66.8293	66.9903	66.5049	67.9426	67.9426	68.7204	69.6682	70.1422	72.5961	73.0769	65.8654	61.0577	59.6154	63.9423
Bahrain	BHR	Government Effectiveness: Percentile Rank, Lower Bound of 90% Confidence Interval	GE.PER.RNK.LOWER	67.7596	62.1762	62.5641	63.2653	62.7551	65.0246	57.8431	56.0976	53.8835	55.3398	58.3732	57.4163	60.6635	60.6635	61.6114	60.5769	60.0962	50.9615	44.2308	45.6731	48.5577
Bahrain	BHR	Government Effectiveness: Percentile Rank, Upper Bound of 90% Confidence Interval	GE.PER.RNK.UPPER	83.6066	82.3834	82.0513	78.0612	77.551	78.8177	72.0588	74.6342	77.6699	77.1845	75.5981	75.5981	76.7772	76.3033	77.7251	76.4423	76.4423	73.0769	73.0769	73.0769	74.0385
Bahrain	BHR	Government Effectiveness: Standard Error	GE.STD.ERR	0.173904	0.228348	0.246868	0.186423	0.213916	0.200272	0.1887	0.201582	0.231543	0.240502	0.221627	0.227007	0.221818	0.220163	0.215414	0.23484	0.233878	0.221858	0.244996	0.248942	0.235724
Bahrain	BHR	Political Stability and Absence of Violence/Terrorism: Estimate	PV.EST	-0.307728	-0.161498	0.055774	0.284146	0.483239	0.312665	0.0116022	-0.366437	-0.247197	-0.237403	-0.136449	-0.493476	-0.950842	-1.12996	-1.33542	-0.907475	-1.07354	-0.793426	-0.961425	-0.840905	-0.661518
Bahrain	BHR	Political Stability and Absence of Violence/Terrorism: Number of Sources	PV.NO.SRC	4	4	4	4	4	6	6	6	6	6	7	7	7	7	7	7	7	7	6	6	6
Bahrain	BHR	Political Stability and Absence of Violence/Terrorism: Percentile Rank	PV.PER.RNK	36.7021	37.766	48.1482	53.9682	62.3116	55.8252	46.6019	32.3672	36.715	36.5385	40.7583	28.9099	18.9574	15.6398	9.00474	15.7143	12.381	19.5238	14.2857	17.6191	22.3809
Bahrain	BHR	Political Stability and Absence of Violence/Terrorism: Percentile Rank, Lower Bound of 90% Confidence Interval	PV.PER.RNK.LOWER	20.7447	21.8085	30.1587	39.1534	41.206	39.8058	33.4951	22.2222	23.6715	23.5577	27.0142	19.4313	10.4265	7.109	6.16114	9.04762	9.04762	10.9524	9.04762	11.4286	12.8571
Bahrain	BHR	Political Stability and Absence of Violence/Terrorism: Percentile Rank, Upper Bound of 90% Confidence Interval	PV.PER.RNK.UPPER	57.4468	61.1702	69.8413	73.0159	80.9045	73.7864	61.1651	48.7923	48.7923	50.9615	52.6066	42.1801	29.3839	21.801	18.0095	25.7143	21.4286	28.0952	25.2381	29.0476	36.1905
Bahrain	BHR	Political Stability and Absence of Violence/Terrorism: Standard Error	PV.STD.ERR	0.373857	0.345463	0.342809	0.316106	0.302047	0.287286	0.278669	0.274181	0.262606	0.264087	0.246402	0.243547	0.24425	0.226807	0.231508	0.200113	0.206815	0.212601	0.224583	0.223906	0.239387
Bahrain	BHR	Regulatory Quality: Estimate	RQ.EST	0.790487	0.806488	0.789343	0.907506	0.654211	0.711522	0.662023	0.683345	0.765329	0.711043	0.69425	0.713898	0.720997	0.689447	0.607382	0.708473	0.819667	0.608239	0.414516	0.416923	0.485098
Bahrain	BHR	Regulatory Quality: Number of Sources	RQ.NO.SRC	4	4	4	6	5	6	6	6	6	6	7	7	7	7	7	7	7	7	6	6	7
Bahrain	BHR	Regulatory Quality: Percentile Rank	RQ.PER.RNK	74.4565	75.6477	78.4615	77.0408	70.4082	72.9064	70.098	71.0784	73.301	73.301	73.6842	74.6411	75.8294	73.9337	71.564	74.0385	76.4423	72.1154	66.8269	67.3077	67.7885
Bahrain	BHR	Regulatory Quality: Percentile Rank, Lower Bound of 90% Confidence Interval	RQ.PER.RNK.LOWER	62.5	61.1399	63.5897	68.8775	64.7959	64.532	62.2549	61.2745	64.0777	63.1068	62.201	62.6794	62.0853	59.2417	58.7678	63.4615	68.2692	62.5	57.2115	57.2115	60.5769
Bahrain	BHR	Regulatory Quality: Percentile Rank, Upper Bound of 90% Confidence Interval	RQ.PER.RNK.UPPER	88.587	90.6736	89.2308	85.7143	78.5714	78.8177	76.9608	79.902	83.9806	81.5534	80.3828	81.8182	80.5687	81.0427	79.6209	82.2115	84.6154	80.7692	75.9615	75.4808	75.4808
Bahrain	BHR	Regulatory Quality: Standard Error	RQ.STD.ERR	0.311746	0.340724	0.315328	0.225448	0.195179	0.201422	0.168416	0.205354	0.21544	0.22103	0.201035	0.204822	0.203751	0.226034	0.223337	0.2317	0.223289	0.231666	0.2292	0.227744	0.220838
Bahrain	BHR	Rule of Law: Estimate	RL.EST	-0.0101163	0.377479	0.298458	0.56769	0.620201	0.709429	0.606275	0.379538	0.53283	0.532877	0.517286	0.435519	0.352287	0.258339	0.331084	0.41372	0.425048	0.456381	0.446703	0.412273	0.494378
Bahrain	BHR	Rule of Law: Number of Sources	RL.NO.SRC	5	5	6	8	8	9	9	9	9	9	11	11	11	11	11	9	9	8	7	7	8
Bahrain	BHR	Rule of Law: Percentile Rank	RL.PER.RNK	50.7538	65	61.8812	68.3168	71.2871	71.2919	67.4641	61.7225	66.5072	65.8654	64.455	63.5071	62.4413	61.5023	61.9718	68.2692	67.3077	67.3077	67.3077	65.8654	68.75
Bahrain	BHR	Rule of Law: Percentile Rank, Lower Bound of 90% Confidence Interval	RL.PER.RNK.LOWER	39.196	51.5	50.9901	59.901	61.8812	62.6794	59.3301	55.9809	58.8517	59.1346	61.6114	60.6635	58.216	55.3991	55.3991	61.5385	60.0962	58.6538	59.1346	57.6923	60.5769
Bahrain	BHR	Rule of Law: Percentile Rank, Upper Bound of 90% Confidence Interval	RL.PER.RNK.UPPER	62.3116	74	69.802	77.7228	79.703	83.2536	80.3828	68.8995	74.6411	74.5192	71.564	68.7204	67.1362	65.7277	68.0751	75.4808	75	76.4423	76.4423	75	77.4039
Bahrain	BHR	Rule of Law: Standard Error	RL.STD.ERR	0.220147	0.233988	0.188165	0.191459	0.205847	0.182599	0.177926	0.17869	0.181412	0.177738	0.161294	0.15994	0.151491	0.159416	0.161115	0.180121	0.177928	0.198474	0.193008	0.18393	0.17905
Bahrain	BHR	Voice and Accountability: Estimate	VA.EST	-0.718783	-1.0654	-1.05688	-0.571164	-0.590706	-0.561549	-0.743175	-0.903967	-0.856527	-0.868918	-0.791001	-0.96591	-1.21732	-1.31803	-1.31746	-1.31106	-1.31307	-1.37208	-1.38665	-1.40562	-1.41258
Bahrain	BHR	Voice and Accountability: Number of Sources	VA.NO.SRC	5	5	5	8	8	10	10	10	10	10	11	11	10	10	10	7	7	7	6	6	6
Bahrain	BHR	Voice and Accountability: Percentile Rank	VA.PER.RNK	25.5	16.4179	17.4129	31.3433	30.3483	31.25	25	23.5577	25	23.0769	26.5403	19.9052	13.1455	11.2676	12.2066	11.33	11.8227	10.8374	11.33	10.8374	9.85222
Bahrain	BHR	Voice and Accountability: Percentile Rank, Lower Bound of 90% Confidence Interval	VA.PER.RNK.LOWER	16	7.9602	9.45274	22.3881	23.8806	23.0769	19.7115	17.3077	17.3077	17.7885	19.9052	13.7441	8.4507	6.10329	5.6338	5.91133	6.89655	5.91133	5.91133	5.41872	4.92611
Bahrain	BHR	Voice and Accountability: Percentile Rank, Upper Bound of 90% Confidence Interval	VA.PER.RNK.UPPER	37.5	29.8508	28.3582	41.2935	39.801	38.4615	32.6923	28.8462	29.8077	28.8462	29.8578	27.9621	19.2488	15.493	15.0235	19.7044	20.197	16.2562	15.2709	15.7636	16.2562
Bahrain	BHR	Voice and Accountability: Standard Error	VA.STD.ERR	0.223274	0.233954	0.22686	0.173804	0.165558	0.147785	0.152731	0.126929	0.127836	0.123012	0.12089	0.118177	0.122787	0.12509	0.121157	0.145528	0.144301	0.139203	0.140842	0.147234	0.139949
Egypt, Arab Rep.	EGY	Control of Corruption: Estimate	CC.EST	-0.472254	-0.456339	-0.553568	-0.409349	-0.552832	-0.647139	-0.624449	-0.747485	-0.762018	-0.779132	-0.515469	-0.631366	-0.695504	-0.598088	-0.631305	-0.624815	-0.638062	-0.644725	-0.53666	-0.565869	-0.670213
Egypt, Arab Rep.	EGY	Control of Corruption: Number of Sources	CC.NO.SRC	5	7	7	7	8	10	10	12	12	12	13	13	14	16	16	15	15	14	15	14	13
Egypt, Arab Rep.	EGY	Control of Corruption: Percentile Rank	CC.PER.RNK	38.7097	38.6598	34.0102	42.4242	35.3535	29.2683	31.2195	25.3658	24.2718	23.7864	36.3636	30.9524	25.5924	33.1754	31.7536	30.7692	30.7692	31.25	35.5769	31.7308	27.8846
Egypt, Arab Rep.	EGY	Control of Corruption: Percentile Rank, Lower Bound of 90% Confidence Interval	CC.PER.RNK.LOWER	19.8925	28.3505	21.3198	29.798	21.2121	17.561	18.0488	17.0732	16.5049	15.0485	23.9234	19.5238	18.4834	22.2749	21.327	21.1538	19.2308	17.7885	23.5577	24.0385	18.75
Egypt, Arab Rep.	EGY	Control of Corruption: Percentile Rank, Upper Bound of 90% Confidence Interval	CC.PER.RNK.UPPER	53.7634	51.5464	48.2234	53.5354	47.9798	42.439	44.8781	37.561	36.8932	35.4369	50.2392	42.3809	39.3365	43.128	41.7062	42.7885	42.3077	39.9038	44.2308	42.3077	36.5385
Egypt, Arab Rep.	EGY	Control of Corruption: Standard Error	CC.STD.ERR	0.244906	0.188451	0.200474	0.183226	0.17957	0.16454	0.165553	0.15276	0.157365	0.155007	0.160074	0.157258	0.149801	0.134911	0.133506	0.13154	0.133618	0.139761	0.125064	0.128452	0.136793
Egypt, Arab Rep.	EGY	Government Effectiveness: Estimate	GE.EST	-0.473676	-0.230692	-0.217753	-0.406014	-0.336621	-0.265809	-0.415194	-0.50644	-0.389129	-0.365895	-0.279506	-0.370582	-0.568378	-0.808497	-0.877399	-0.822677	-0.769484	-0.659546	-0.619675	-0.584804	-0.423538
Egypt, Arab Rep.	EGY	Government Effectiveness: Number of Sources	GE.NO.SRC	4	6	6	7	7	8	8	10	10	10	10	10	11	11	12	12	12	11	12	12	12
Egypt, Arab Rep.	EGY	Government Effectiveness: Percentile Rank	GE.PER.RNK	36.0656	48.7047	48.2051	41.3265	44.898	47.2906	40.6863	36.0976	43.2039	43.2039	47.3684	42.1053	35.0711	23.2228	20.8531	20.1923	22.1154	27.8846	29.3269	30.7692	36.5385
Egypt, Arab Rep.	EGY	Government Effectiveness: Percentile Rank, Lower Bound of 90% Confidence Interval	GE.PER.RNK.LOWER	21.8579	30.5699	32.3077	27.551	29.0816	35.468	28.9216	23.4146	26.699	28.6408	34.9282	28.7081	18.9574	12.7962	12.3223	13.4615	12.5	16.8269	17.3077	17.3077	23.5577
Egypt, Arab Rep.	EGY	Government Effectiveness: Percentile Rank, Upper Bound of 90% Confidence Interval	GE.PER.RNK.UPPER	48.0874	60.6218	61.0256	53.0612	58.1633	57.6355	50.4902	48.2927	51.9417	52.9126	56.4593	51.1962	45.9716	37.9147	32.2275	32.2115	36.5385	39.4231	39.4231	40.8654	47.5962
Egypt, Arab Rep.	EGY	Government Effectiveness: Standard Error	GE.STD.ERR	0.171663	0.196593	0.196535	0.174319	0.177603	0.169681	0.171431	0.173147	0.193938	0.190993	0.185603	0.189236	0.187781	0.187805	0.170496	0.180167	0.175529	0.178481	0.176826	0.180599	0.188435
Egypt, Arab Rep.	EGY	Political Stability and Absence of Violence/Terrorism: Estimate	PV.EST	-0.523576	-0.0185278	0.0531098	-0.413438	-0.640129	-0.821635	-0.63018	-0.838823	-0.551374	-0.510508	-0.607051	-0.898418	-1.43706	-1.43633	-1.63883	-1.63118	-1.49665	-1.4377	-1.4243	-1.17003	-1.06642
Egypt, Arab Rep.	EGY	Political Stability and Absence of Violence/Terrorism: Number of Sources	PV.NO.SRC	4	4	4	4	5	6	6	7	7	7	7	7	7	8	8	8	8	7	8	8	7
Egypt, Arab Rep.	EGY	Political Stability and Absence of Violence/Terrorism: Percentile Rank	PV.PER.RNK	27.6596	44.1489	47.6191	31.2169	27.6382	21.3592	26.699	22.2222	27.0531	28.8462	25.5924	19.4313	6.63507	7.58294	7.109	7.61905	8.57143	9.04762	9.04762	12.381	12.8571
Egypt, Arab Rep.	EGY	Political Stability and Absence of Violence/Terrorism: Percentile Rank, Lower Bound of 90% Confidence Interval	PV.PER.RNK.LOWER	13.2979	27.1277	30.1587	20.1058	16.0804	12.6214	16.9903	13.0435	17.3913	16.8269	16.1137	10.4265	4.2654	5.21327	3.79147	6.19048	6.66667	7.14286	7.14286	7.61905	8.57143
Egypt, Arab Rep.	EGY	Political Stability and Absence of Violence/Terrorism: Percentile Rank, Upper Bound of 90% Confidence Interval	PV.PER.RNK.UPPER	49.4681	65.4255	69.8413	48.1482	38.6935	32.5243	40.2913	31.401	38.6473	39.9038	38.3886	27.9621	16.1137	16.1137	10.4265	8.57143	10.4762	12.8571	13.3333	18.0952	21.4286
Egypt, Arab Rep.	EGY	Political Stability and Absence of Violence/Terrorism: Standard Error	PV.STD.ERR	0.373857	0.345463	0.342809	0.316106	0.292475	0.287286	0.278669	0.253119	0.244181	0.246403	0.246402	0.243547	0.24425	0.221984	0.22802	0.196386	0.202983	0.211121	0.215911	0.214933	0.233699
Egypt, Arab Rep.	EGY	Regulatory Quality: Estimate	RQ.EST	-0.04817	-0.325537	-0.339442	-0.482996	-0.598129	-0.508437	-0.424104	-0.435703	-0.28873	-0.182439	-0.197176	-0.17463	-0.343916	-0.475141	-0.640084	-0.76256	-0.835593	-0.92319	-0.862057	-0.863224	-0.827766
Egypt, Arab Rep.	EGY	Regulatory Quality: Number of Sources	RQ.NO.SRC	5	7	7	8	8	9	9	10	10	10	10	10	10	12	12	12	12	11	11	11	11
Egypt, Arab Rep.	EGY	Regulatory Quality: Percentile Rank	RQ.PER.RNK	53.2609	37.3057	36.9231	35.7143	27.551	33.0049	38.7255	36.7647	43.2039	49.5146	46.8899	46.8899	41.2322	33.6493	29.3839	26.4423	22.1154	17.7885	17.3077	17.3077	18.75
Egypt, Arab Rep.	EGY	Regulatory Quality: Percentile Rank, Lower Bound of 90% Confidence Interval	RQ.PER.RNK.LOWER	27.7174	22.7979	22.0513	20.4082	18.8775	20.6897	25.4902	23.0392	29.1262	35.9223	34.9282	35.8852	28.9099	24.6445	21.801	14.4231	12.5	9.13462	11.0577	10.0961	11.5385
Egypt, Arab Rep.	EGY	Regulatory Quality: Percentile Rank, Upper Bound of 90% Confidence Interval	RQ.PER.RNK.UPPER	64.6739	56.4767	55.3846	48.4694	44.3878	46.798	49.0196	50.4902	53.3981	54.8544	53.5885	54.067	51.1848	45.0237	37.4408	33.1731	30.2885	26.9231	29.3269	29.8077	30.2885
Egypt, Arab Rep.	EGY	Regulatory Quality: Standard Error	RQ.STD.ERR	0.28814	0.249748	0.224339	0.204872	0.177445	0.174058	0.156505	0.174777	0.174263	0.170774	0.1633	0.162988	0.162188	0.160263	0.158547	0.163206	0.158776	0.162697	0.165856	0.16448	0.164172
Egypt, Arab Rep.	EGY	Rule of Law: Estimate	RL.EST	0.0012624	-0.0404679	-0.0107841	0.0123453	0.0213656	0.0195379	-0.0241827	-0.25781	-0.229975	-0.12925	-0.105177	-0.17942	-0.452047	-0.472384	-0.633282	-0.662516	-0.601283	-0.517301	-0.542538	-0.412393	-0.420846
Egypt, Arab Rep.	EGY	Rule of Law: Number of Sources	RL.NO.SRC	7	9	9	10	11	13	13	15	15	16	16	16	17	18	18	16	16	14	15	15	15
Egypt, Arab Rep.	EGY	Rule of Law: Percentile Rank	RL.PER.RNK	51.7588	50	50.9901	54.4554	53.9604	52.6316	52.6316	47.3684	48.3254	51.4423	52.6066	49.763	41.784	40.3756	33.3333	29.3269	31.25	32.6923	32.6923	37.5	37.9808
Egypt, Arab Rep.	EGY	Rule of Law: Percentile Rank, Lower Bound of 90% Confidence Interval	RL.PER.RNK.LOWER	40.201	39	42.0792	45.0495	45.0495	44.4976	44.4976	39.2345	38.2775	41.8269	45.0237	41.2322	30.0469	30.0469	22.0657	18.2692	20.6731	23.5577	23.0769	27.8846	27.4038
Egypt, Arab Rep.	EGY	Rule of Law: Percentile Rank, Upper Bound of 90% Confidence Interval	RL.PER.RNK.UPPER	62.3116	61	59.901	60.396	62.8713	59.3301	58.3732	53.1101	53.5885	58.1731	57.8199	55.4502	47.8873	46.9484	41.3145	37.5	41.8269	44.7115	41.3462	48.0769	47.1154
Egypt, Arab Rep.	EGY	Rule of Law: Standard Error	RL.STD.ERR	0.204047	0.196957	0.164162	0.175409	0.178259	0.161742	0.156774	0.144481	0.147009	0.141122	0.138317	0.135978	0.130131	0.130855	0.128346	0.138334	0.139598	0.157171	0.143516	0.138701	0.140915
Egypt, Arab Rep.	EGY	Voice and Accountability: Estimate	VA.EST	-0.844184	-0.911786	-0.894506	-1.10229	-1.08319	-0.947558	-0.964781	-1.19927	-1.16775	-1.21224	-1.1575	-1.18805	-1.13998	-0.765064	-1.05156	-1.1806	-1.19042	-1.2045	-1.25069	-1.31154	-1.42867
Egypt, Arab Rep.	EGY	Voice and Accountability: Number of Sources	VA.NO.SRC	6	6	8	10	10	13	14	16	16	16	17	17	18	19	19	15	15	14	15	15	13
Egypt, Arab Rep.	EGY	Voice and Accountability: Percentile Rank	VA.PER.RNK	22	21.393	22.3881	16.4179	18.408	21.6346	21.1538	14.4231	14.9039	13.4615	14.218	13.7441	14.0845	25.8216	16.9014	14.7783	14.7783	14.2857	13.3005	13.3005	8.37438
Egypt, Arab Rep.	EGY	Voice and Accountability: Percentile Rank, Lower Bound of 90% Confidence Interval	VA.PER.RNK.LOWER	14	11.9403	12.9353	10.9453	9.95025	16.3462	13.4615	8.65385	10.0961	9.13462	9.95261	9.95261	11.7371	20.1878	14.554	8.86699	9.85222	9.85222	8.86699	6.89655	5.41872
Egypt, Arab Rep.	EGY	Voice and Accountability: Percentile Rank, Upper Bound of 90% Confidence Interval	VA.PER.RNK.UPPER	35	32.8358	30.8458	22.3881	24.8756	25.9615	25	19.2308	19.7115	18.2692	20.3791	18.9574	20.1878	29.108	23.9437	21.1823	21.1823	22.1675	19.7044	18.2266	14.2857
Egypt, Arab Rep.	EGY	Voice and Accountability: Standard Error	VA.STD.ERR	0.20881	0.214446	0.192938	0.156962	0.156959	0.13771	0.138627	0.110006	0.111849	0.109445	0.111259	0.109906	0.110784	0.107736	0.103857	0.120154	0.121644	0.119697	0.119724	0.124262	0.118309
Jordan	JOR	Control of Corruption: Estimate	CC.EST	-0.0354075	0.098122	0.0837996	-0.0521463	0.314559	0.255592	0.256805	0.259316	0.264059	0.356088	0.158885	0.0411859	0.101029	0.072144	0.0679131	0.13568	0.260073	0.265293	0.25977	0.149578	0.127979
Jordan	JOR	Control of Corruption: Number of Sources	CC.NO.SRC	5	6	6	6	9	10	10	12	13	13	13	13	13	14	13	12	12	12	11	11	12
Jordan	JOR	Control of Corruption: Percentile Rank	CC.PER.RNK	55.3763	59.7938	59.3909	56.0606	65.6566	61.9512	62.9268	64.3902	64.0777	66.5049	62.201	59.5238	61.1374	60.6635	60.1896	59.6154	64.4231	64.9039	63.9423	60.5769	60.5769
Jordan	JOR	Control of Corruption: Percentile Rank, Lower Bound of 90% Confidence Interval	CC.PER.RNK.LOWER	39.785	48.9691	47.2081	43.4344	58.5859	56.0976	56.0976	57.561	57.767	60.6796	55.9809	52.3809	54.0284	53.5545	54.0284	54.3269	58.1731	59.1346	58.1731	55.7692	51.4423
Jordan	JOR	Control of Corruption: Percentile Rank, Upper Bound of 90% Confidence Interval	CC.PER.RNK.UPPER	65.0538	67.5258	69.0355	63.6364	74.2424	71.7073	69.2683	71.2195	71.3592	73.301	69.378	63.8095	67.2986	64.9289	64.455	65.8654	67.7885	67.3077	66.8269	65.8654	64.9039
Jordan	JOR	Control of Corruption: Standard Error	CC.STD.ERR	0.244906	0.193166	0.206201	0.187944	0.165327	0.155465	0.154814	0.146372	0.149779	0.146591	0.151067	0.152959	0.145875	0.134304	0.134771	0.131623	0.131734	0.13387	0.127925	0.129354	0.137063
Jordan	JOR	Government Effectiveness: Estimate	GE.EST	-0.0329143	0.0477654	-0.0157826	0.106583	0.212871	0.0609842	0.0282044	0.202514	0.226626	0.228669	0.235816	0.103684	0.0882191	-0.0112745	-0.0489184	0.116841	0.122487	0.13379	0.109076	0.112718	0.0994703
Jordan	JOR	Government Effectiveness: Number of Sources	GE.NO.SRC	4	5	5	6	7	8	8	10	10	10	10	10	9	10	10	10	10	10	9	10	10
Jordan	JOR	Government Effectiveness: Percentile Rank	GE.PER.RNK	56.8306	59.0674	55.8974	61.2245	64.2857	60.0985	56.8627	60.9756	61.6505	62.1359	62.201	58.8517	58.7678	55.9242	53.5545	59.1346	59.1346	59.1346	57.6923	57.2115	56.7308
Jordan	JOR	Government Effectiveness: Percentile Rank, Lower Bound of 90% Confidence Interval	GE.PER.RNK.LOWER	44.2623	44.5596	43.5897	49.4898	56.6326	48.7685	46.5686	54.1463	51.4563	51.9417	51.6746	46.4115	46.9194	44.0758	43.6019	45.1923	47.1154	45.6731	43.75	46.6346	41.3462
Jordan	JOR	Government Effectiveness: Percentile Rank, Upper Bound of 90% Confidence Interval	GE.PER.RNK.UPPER	62.2951	68.3938	65.1282	66.8367	70.9184	67.4877	62.2549	68.7805	70.8738	69.9029	69.8565	66.5072	66.3507	62.5592	62.0853	69.2308	68.75	68.75	68.75	68.75	68.2692
Jordan	JOR	Government Effectiveness: Standard Error	GE.STD.ERR	0.171663	0.204377	0.203417	0.176925	0.177201	0.178633	0.174813	0.177984	0.193968	0.19664	0.191172	0.194898	0.199259	0.191662	0.190132	0.195053	0.196569	0.189119	0.201752	0.195512	0.201599
Jordan	JOR	Political Stability and Absence of Violence/Terrorism: Estimate	PV.EST	-0.0440035	0.0759973	0.0006835	-0.461082	-0.0736035	-0.234769	-0.133758	-0.763257	-0.299699	-0.369226	-0.354287	-0.312493	-0.513562	-0.523978	-0.606315	-0.540026	-0.605779	-0.492398	-0.497875	-0.412433	-0.357862
Jordan	JOR	Political Stability and Absence of Violence/Terrorism: Number of Sources	PV.NO.SRC	4	4	4	5	6	7	7	8	8	8	8	8	9	9	9	9	9	9	9	9	8
Jordan	JOR	Political Stability and Absence of Violence/Terrorism: Percentile Rank	PV.PER.RNK	46.8085	48.4042	43.9153	30.1587	40.7035	36.8932	41.7476	23.6715	34.7826	30.7692	32.2275	34.5972	30.3317	29.3839	26.0663	27.6191	25.7143	27.1429	29.0476	30.9524	33.3333
Jordan	JOR	Political Stability and Absence of Violence/Terrorism: Percentile Rank, Lower Bound of 90% Confidence Interval	PV.PER.RNK.LOWER	23.4043	29.7872	29.1005	20.1058	29.1457	23.301	28.1553	13.5266	23.6715	19.7115	21.327	24.1706	19.4313	19.4313	17.5356	17.1429	17.1429	17.1429	17.1429	19.5238	20
Jordan	JOR	Political Stability and Absence of Violence/Terrorism: Percentile Rank, Upper Bound of 90% Confidence Interval	PV.PER.RNK.UPPER	65.9574	68.0851	69.8413	47.09	59.2965	53.3981	55.3398	32.3672	46.3768	44.7115	45.9716	49.763	41.2322	39.8104	37.9147	36.6667	35.7143	39.5238	39.5238	44.2857	48.0952
Jordan	JOR	Political Stability and Absence of Violence/Terrorism: Standard Error	PV.STD.ERR	0.373857	0.345463	0.342809	0.301078	0.283212	0.279339	0.270614	0.245999	0.23913	0.241629	0.24186	0.239331	0.238522	0.219666	0.225787	0.192247	0.198164	0.204957	0.211684	0.210792	0.227832
Jordan	JOR	Regulatory Quality: Estimate	RQ.EST	0.0244693	0.417494	0.255968	0.0447482	0.205446	0.293484	0.0972653	0.330412	0.305014	0.316555	0.273881	0.226069	0.29543	0.193677	0.135905	0.076422	0.0833356	0.0516795	0.0962652	0.0298972	0.0346094
Jordan	JOR	Regulatory Quality: Number of Sources	RQ.NO.SRC	5	6	6	7	8	9	9	10	10	10	10	10	10	12	12	12	12	12	10	11	11
Jordan	JOR	Regulatory Quality: Percentile Rank	RQ.PER.RNK	55.4348	66.3212	63.0769	57.6531	59.1837	64.532	56.3725	61.2745	61.1651	61.6505	59.3301	57.4163	59.7156	56.872	56.872	54.8077	54.8077	54.3269	57.6923	56.7308	57.2115
Jordan	JOR	Regulatory Quality: Percentile Rank, Lower Bound of 90% Confidence Interval	RQ.PER.RNK.LOWER	30.4348	51.8135	44.6154	43.3674	52.551	54.6798	49.5098	54.4118	53.3981	53.8835	52.6316	51.1962	52.6066	50.7109	47.8673	46.6346	48.0769	45.6731	45.6731	42.7885	42.3077
Jordan	JOR	Regulatory Quality: Percentile Rank, Upper Bound of 90% Confidence Interval	RQ.PER.RNK.UPPER	65.7609	79.2746	72.8205	65.8163	67.3469	68.4729	61.7647	70.098	68.4466	68.4466	66.9857	67.9426	70.6161	66.8247	63.981	64.4231	64.4231	64.9039	66.3461	63.9423	64.4231
Jordan	JOR	Regulatory Quality: Standard Error	RQ.STD.ERR	0.28814	0.277169	0.245311	0.213648	0.174462	0.178394	0.157354	0.180979	0.183683	0.17862	0.171347	0.170809	0.168646	0.16213	0.163779	0.169447	0.164837	0.168426	0.190734	0.174216	0.173645
Jordan	JOR	Rule of Law: Estimate	RL.EST	0.276933	0.354139	0.36911	0.112153	0.35686	0.316052	0.325274	0.332674	0.38737	0.411545	0.250783	0.192973	0.237919	0.369098	0.392967	0.464213	0.439426	0.3043	0.261328	0.233432	0.143957
Jordan	JOR	Rule of Law: Number of Sources	RL.NO.SRC	7	8	8	9	11	12	13	15	16	16	16	16	16	17	16	14	14	13	12	13	13
Jordan	JOR	Rule of Law: Percentile Rank	RL.PER.RNK	60.804	64.5	63.8614	57.4257	63.8614	59.8086	60.7655	61.244	61.244	62.5	61.6114	61.1374	61.5023	62.9108	62.9108	68.75	67.7885	61.0577	61.0577	61.0577	58.1731
Jordan	JOR	Rule of Law: Percentile Rank, Lower Bound of 90% Confidence Interval	RL.PER.RNK.LOWER	48.2412	53.5	54.4554	48.0198	54.9505	55.5024	55.9809	55.9809	58.3732	58.1731	54.9763	54.0284	55.8685	59.6244	59.1549	64.9039	62.9808	55.2885	52.4038	53.8462	50.4808
Jordan	JOR	Rule of Law: Percentile Rank, Upper Bound of 90% Confidence Interval	RL.PER.RNK.UPPER	67.8392	73	71.2871	64.3564	71.2871	67.4641	66.0287	66.5072	69.378	70.1923	63.981	62.5592	62.4413	67.1362	68.5446	75.4808	74.0385	71.6346	69.2308	68.75	64.9039
Jordan	JOR	Rule of Law: Standard Error	RL.STD.ERR	0.204047	0.202749	0.166742	0.182179	0.171008	0.158108	0.154606	0.148287	0.146925	0.140262	0.139104	0.137832	0.129202	0.133131	0.134334	0.145226	0.143067	0.157564	0.158921	0.144766	0.147129
Jordan	JOR	Voice and Accountability: Estimate	VA.EST	-0.238322	-0.42002	-0.284869	-0.796564	-0.634042	-0.549855	-0.514288	-0.717005	-0.676781	-0.737369	-0.784595	-0.799326	-0.796205	-0.734493	-0.806755	-0.753646	-0.769385	-0.711113	-0.721102	-0.700138	-0.665045
Jordan	JOR	Voice and Accountability: Number of Sources	VA.NO.SRC	6	6	7	9	11	13	14	16	17	17	17	17	17	18	17	13	12	12	12	12	11
Jordan	JOR	Voice and Accountability: Percentile Rank	VA.PER.RNK	42	36.3184	41.791	25.3731	29.8508	31.7308	32.2115	27.8846	28.8462	26.9231	27.0142	27.0142	26.2911	26.7606	24.8826	26.601	25.6158	27.0936	26.601	28.0788	28.5714
Jordan	JOR	Voice and Accountability: Percentile Rank, Lower Bound of 90% Confidence Interval	VA.PER.RNK.LOWER	32.5	27.3632	30.3483	18.408	23.8806	25	24.5192	23.0769	24.5192	21.6346	20.8531	19.4313	20.1878	21.1268	19.2488	21.1823	21.6749	22.6601	22.6601	22.6601	22.6601
Jordan	JOR	Voice and Accountability: Percentile Rank, Upper Bound of 90% Confidence Interval	VA.PER.RNK.UPPER	53.5	47.2637	52.2388	32.8358	38.3085	38.9423	40.3846	31.25	32.6923	29.8077	29.8578	29.8578	28.6385	30.0469	28.169	30.5419	29.064	32.0197	32.0197	32.0197	32.5123
Jordan	JOR	Voice and Accountability: Standard Error	VA.STD.ERR	0.20881	0.214446	0.20282	0.164575	0.156107	0.142484	0.142671	0.116063	0.113324	0.110964	0.112827	0.111123	0.110258	0.109883	0.108879	0.127568	0.129908	0.125609	0.12596	0.129779	0.124039
Kuwait	KWT	Control of Corruption: Estimate	CC.EST	0.478682	0.590752	0.590601	1.01409	0.799126	0.786469	0.507472	0.433033	0.370586	0.420186	0.309361	0.302229	0.0862528	-0.190458	-0.188342	-0.240323	-0.225097	-0.268207	-0.331509	-0.289452	-0.132789
Kuwait	KWT	Control of Corruption: Number of Sources	CC.NO.SRC	4	4	4	5	4	4	6	7	7	8	8	8	8	7	7	7	7	7	7	7	7
Kuwait	KWT	Control of Corruption: Percentile Rank	CC.PER.RNK	70.4301	74.2268	73.6041	82.8283	77.2727	76.0976	69.2683	69.7561	69.4175	68.932	67.4641	65.2381	59.7156	52.1327	52.6066	50.9615	51.4423	48.0769	44.7115	44.7115	50.9615
Kuwait	KWT	Control of Corruption: Percentile Rank, Lower Bound of 90% Confidence Interval	CC.PER.RNK.LOWER	59.1398	63.4021	61.4213	76.7677	70.7071	67.8049	60.4878	60	58.2524	61.1651	59.3301	58.0952	53.0806	38.3886	39.8104	36.0577	37.5	32.6923	31.25	33.6538	37.5
Kuwait	KWT	Control of Corruption: Percentile Rank, Upper Bound of 90% Confidence Interval	CC.PER.RNK.UPPER	80.6452	81.9588	83.7563	85.8586	83.8384	84.8781	77.561	74.1463	73.7864	74.2718	72.2488	72.3809	68.2464	60.6635	60.6635	57.6923	58.1731	58.1731	54.8077	56.25	60.5769
Kuwait	KWT	Control of Corruption: Standard Error	CC.STD.ERR	0.262077	0.231376	0.256956	0.199504	0.24126	0.233554	0.183893	0.171711	0.176416	0.171166	0.177592	0.175946	0.171654	0.169069	0.170953	0.162059	0.161205	0.16742	0.148884	0.160783	0.176349
Kuwait	KWT	Government Effectiveness: Estimate	GE.EST	0.115852	-0.0639357	-0.0835127	0.107337	0.12475	0.103922	0.174501	0.287202	0.0996809	-0.0072513	0.202237	0.168634	0.0245808	-0.0703019	-0.0706692	-0.148399	-0.0332199	-0.163533	-0.176568	-0.0878059	0.0184673
Kuwait	KWT	Government Effectiveness: Number of Sources	GE.NO.SRC	3	3	3	4	3	3	5	7	7	7	7	7	7	7	7	7	7	7	7	7	7
Kuwait	KWT	Government Effectiveness: Percentile Rank	GE.PER.RNK	59.0164	55.9586	53.8462	61.7347	62.7551	61.5763	60.2941	63.4146	56.3107	55.8252	60.7655	60.7655	55.9242	51.6588	52.6066	47.1154	52.8846	48.5577	46.1538	49.5192	52.8846
Kuwait	KWT	Government Effectiveness: Percentile Rank, Lower Bound of 90% Confidence Interval	GE.PER.RNK.LOWER	49.7268	38.8601	36.9231	48.9796	48.4694	46.798	50.4902	55.1219	46.1165	42.233	49.2823	47.3684	43.6019	40.2844	40.2844	32.2115	39.4231	35.5769	32.2115	35.5769	38.4615
Kuwait	KWT	Government Effectiveness: Percentile Rank, Upper Bound of 90% Confidence Interval	GE.PER.RNK.UPPER	64.4809	64.2487	65.641	67.8571	70.9184	69.9507	68.1372	70.7317	67.4757	66.0194	69.8565	68.8995	65.8768	62.5592	62.0853	62.0192	65.8654	61.5385	60.0962	63.9423	66.3461
Kuwait	KWT	Government Effectiveness: Standard Error	GE.STD.ERR	0.173904	0.228348	0.246868	0.198361	0.230661	0.245775	0.1887	0.195796	0.224268	0.232747	0.221627	0.227007	0.221818	0.220163	0.215414	0.23484	0.233878	0.221858	0.224452	0.22757	0.235724
Kuwait	KWT	Political Stability and Absence of Violence/Terrorism: Estimate	PV.EST	0.172681	0.455153	0.752351	-0.153678	0.293991	0.344595	0.250893	0.41109	0.620397	0.50161	0.352784	0.451989	0.311103	0.203606	0.166056	0.149006	-0.21342	-0.0496832	-0.045894	0.1098	0.200381
Kuwait	KWT	Political Stability and Absence of Violence/Terrorism: Number of Sources	PV.NO.SRC	4	4	4	4	4	5	6	7	7	7	7	7	7	7	7	7	7	7	7	7	6
Kuwait	KWT	Political Stability and Absence of Violence/Terrorism: Percentile Rank	PV.PER.RNK	52.6596	63.2979	73.0159	42.328	54.7739	56.3107	55.3398	58.4541	68.1159	61.5385	55.4502	61.1374	56.872	53.0806	52.6066	51.4286	39.0476	45.2381	44.7619	51.9048	54.2857
Kuwait	KWT	Political Stability and Absence of Violence/Terrorism: Percentile Rank, Lower Bound of 90% Confidence Interval	PV.PER.RNK.LOWER	31.9149	40.4255	54.4973	26.455	37.6884	39.8058	39.3204	45.4106	50.7246	47.1154	41.7062	47.8673	41.7062	39.8104	38.3886	38.0952	25.7143	30.4762	30.4762	37.6191	40
Kuwait	KWT	Political Stability and Absence of Violence/Terrorism: Percentile Rank, Upper Bound of 90% Confidence Interval	PV.PER.RNK.UPPER	72.8723	81.383	92.5926	59.7884	71.8593	74.7573	66.9903	72.4638	83.5749	77.4039	72.0379	75.8294	68.7204	63.5071	64.455	60.9524	51.9048	56.6667	57.6191	61.9048	66.6667
Kuwait	KWT	Political Stability and Absence of Violence/Terrorism: Standard Error	PV.STD.ERR	0.373857	0.345463	0.342809	0.316106	0.302047	0.293484	0.278669	0.253119	0.244181	0.246403	0.246402	0.243547	0.24425	0.226807	0.231508	0.200113	0.206815	0.212601	0.221237	0.219972	0.239387
Kuwait	KWT	Regulatory Quality: Estimate	RQ.EST	0.314012	-0.0378954	-0.0305208	0.363376	0.410733	0.566696	0.473385	0.295331	0.259469	0.174522	0.153575	0.159951	0.0832637	-0.0365543	-0.0714554	-0.145351	-0.173127	-0.073882	-0.0620899	0.0256516	0.0649239
Kuwait	KWT	Regulatory Quality: Number of Sources	RQ.NO.SRC	4	4	4	5	4	4	6	7	7	7	7	7	7	7	7	7	7	7	7	7	7
Kuwait	KWT	Regulatory Quality: Percentile Rank	RQ.PER.RNK	64.1304	51.8135	52.8205	64.7959	66.8367	68.4729	63.7255	59.8039	58.7379	56.7961	56.4593	55.5024	54.9763	52.6066	50.7109	49.0385	48.5577	52.8846	53.3654	55.7692	57.6923
Kuwait	KWT	Regulatory Quality: Percentile Rank, Lower Bound of 90% Confidence Interval	RQ.PER.RNK.LOWER	46.1957	25.3886	28.2051	53.0612	56.1225	60.5911	58.3333	53.4314	51.4563	50.4854	47.3684	46.4115	42.654	37.4408	35.545	32.2115	31.25	34.6154	35.0962	38.4615	40.8654
Kuwait	KWT	Regulatory Quality: Percentile Rank, Upper Bound of 90% Confidence Interval	RQ.PER.RNK.UPPER	74.4565	68.9119	67.6923	73.4694	73.4694	78.3251	71.0784	69.6078	68.4466	66.0194	65.5502	67.9426	63.0332	60.1896	60.1896	60.5769	59.1346	64.9039	64.9039	65.8654	66.8269
Kuwait	KWT	Regulatory Quality: Standard Error	RQ.STD.ERR	0.311746	0.340724	0.315328	0.248517	0.216303	0.229465	0.168416	0.199898	0.209356	0.214302	0.201035	0.204822	0.203751	0.226034	0.223337	0.2317	0.223289	0.231666	0.222839	0.222648	0.220838
Kuwait	KWT	Rule of Law: Estimate	RL.EST	0.598829	0.636845	0.572777	0.614034	0.574402	0.519019	0.53681	0.538474	0.604888	0.58817	0.586304	0.591725	0.549244	0.367613	0.365627	0.0224906	0.001072	0.0279303	0.101462	0.2104	0.215674
Kuwait	KWT	Rule of Law: Number of Sources	RL.NO.SRC	6	6	6	8	7	7	9	11	11	11	11	11	11	11	11	10	9	8	8	8	9
Kuwait	KWT	Rule of Law: Percentile Rank	RL.PER.RNK	67.3367	70.5	67.8218	69.3069	68.3168	66.0287	65.0718	65.0718	68.8995	68.2692	66.8247	66.8247	66.1972	62.4413	62.4413	59.6154	57.2115	55.2885	57.6923	60.0962	61.0577
Kuwait	KWT	Rule of Law: Percentile Rank, Lower Bound of 90% Confidence Interval	RL.PER.RNK.LOWER	59.2965	60.5	59.901	59.901	60.8911	59.3301	58.8517	59.8086	59.8086	59.1346	61.6114	62.5592	61.9718	57.7465	56.338	46.1538	45.6731	43.2692	47.5962	51.9231	50.9615
Kuwait	KWT	Rule of Law: Percentile Rank, Upper Bound of 90% Confidence Interval	RL.PER.RNK.UPPER	79.8995	82	79.2079	78.7129	78.7129	75.1196	75.5981	70.8134	77.512	77.8846	74.8815	76.7772	74.1784	68.5446	69.4836	65.3846	64.9039	63.4615	63.9423	69.7115	69.2308
Kuwait	KWT	Rule of Law: Standard Error	RL.STD.ERR	0.212429	0.224308	0.184623	0.195665	0.209321	0.199821	0.178405	0.166227	0.167894	0.164002	0.161328	0.160973	0.153116	0.161303	0.162956	0.177245	0.175571	0.195726	0.181722	0.172367	0.176209
Kuwait	KWT	Voice and Accountability: Estimate	VA.EST	-0.243808	-0.299083	-0.297325	-0.361815	-0.396658	-0.303084	-0.483525	-0.581767	-0.545193	-0.543381	-0.484646	-0.524436	-0.558574	-0.642978	-0.657606	-0.65746	-0.663664	-0.62891	-0.606944	-0.58896	-0.63479
Kuwait	KWT	Voice and Accountability: Number of Sources	VA.NO.SRC	6	6	6	8	7	8	10	12	12	12	12	12	11	11	11	9	8	8	8	8	7
Kuwait	KWT	Voice and Accountability: Percentile Rank	VA.PER.RNK	41.5	41.2935	39.801	39.801	38.3085	39.9038	33.6538	30.7692	32.2115	30.2885	31.7536	30.3317	30.0469	27.6995	28.169	28.5714	28.0788	29.064	30.5419	30.5419	29.064
Kuwait	KWT	Voice and Accountability: Percentile Rank, Lower Bound of 90% Confidence Interval	VA.PER.RNK.LOWER	32	30.3483	29.8508	27.8607	26.8657	29.8077	25	25.4808	25	25.4808	28.9099	27.9621	26.2911	24.4132	23.9437	22.1675	23.1527	23.6453	23.6453	25.1231	22.6601
Kuwait	KWT	Voice and Accountability: Percentile Rank, Upper Bound of 90% Confidence Interval	VA.PER.RNK.UPPER	53.5	49.7512	51.7413	46.7662	44.7761	47.5962	41.8269	34.1346	35.5769	35.0962	38.8626	36.019	35.6808	34.2723	33.8028	33.0049	31.0345	34.4828	34.4828	34.4828	33.9901
Kuwait	KWT	Voice and Accountability: Standard Error	VA.STD.ERR	0.20881	0.214446	0.207886	0.189745	0.191659	0.166697	0.156872	0.133417	0.13275	0.132217	0.133876	0.130156	0.134817	0.131973	0.128999	0.138533	0.137859	0.132868	0.133537	0.139781	0.1322
Mauritania	MRT	Control of Corruption: Estimate	CC.EST	-0.555694	-0.468185	-0.453738	-0.0252959	-0.0311151	-0.526517	-0.56022	-0.742441	-0.578712	-0.787821	-0.613362	-0.715361	-0.628131	-0.782562	-0.833635	-0.92755	-0.923314	-0.739235	-0.751324	-0.807347	-0.861584
Mauritania	MRT	Control of Corruption: Number of Sources	CC.NO.SRC	2	4	4	4	4	6	7	10	10	10	11	11	11	11	12	11	11	11	11	11	10
Mauritania	MRT	Control of Corruption: Percentile Rank	CC.PER.RNK	34.4086	37.6289	37.5635	57.0707	57.5758	35.6098	35.6098	26.3415	33.9806	23.301	30.622	26.1905	30.8057	24.1706	21.801	16.8269	17.3077	24.5192	23.0769	23.0769	20.1923
Mauritania	MRT	Control of Corruption: Percentile Rank, Lower Bound of 90% Confidence Interval	CC.PER.RNK.LOWER	12.9032	19.0722	19.797	36.8687	38.8889	18.0488	18.0488	16.5854	19.4175	13.5922	20.0957	16.6667	19.4313	13.2701	11.8483	9.13462	10.0961	13.4615	13.9423	12.5	12.0192
Mauritania	MRT	Control of Corruption: Percentile Rank, Upper Bound of 90% Confidence Interval	CC.PER.RNK.UPPER	57.5269	54.6392	57.3604	71.2121	71.2121	52.6829	51.7073	38.5366	48.5437	36.4078	43.5407	40.4762	44.0758	37.4408	35.0711	29.8077	29.3269	36.5385	38.9423	34.1346	30.2885
Mauritania	MRT	Control of Corruption: Standard Error	CC.STD.ERR	0.340507	0.279505	0.273264	0.284185	0.272351	0.234181	0.212148	0.167231	0.172733	0.170094	0.164711	0.16531	0.162981	0.174752	0.172998	0.172653	0.167635	0.171414	0.167097	0.160429	0.171073
Mauritania	MRT	Government Effectiveness: Estimate	GE.EST	-0.124193	-0.0552722	-0.139976	0.0034894	0.046652	-0.432077	-0.292216	-0.87475	-0.906793	-0.977207	-0.894957	-0.970683	-0.949555	-0.909613	-0.998632	-0.991504	-1.02689	-0.771947	-0.728227	-0.726633	-0.498213
Mauritania	MRT	Government Effectiveness: Number of Sources	GE.NO.SRC	1	3	3	3	3	4	5	8	8	8	9	9	9	9	10	10	10	10	10	10	9
Mauritania	MRT	Government Effectiveness: Percentile Rank	GE.PER.RNK	53.0055	56.4767	50.7692	57.1429	59.6939	41.3793	45.5882	21.4634	16.9903	16.0194	20.0957	16.2679	16.5877	18.9574	15.1659	15.8654	13.9423	21.6346	22.5962	22.5962	34.6154
Mauritania	MRT	Government Effectiveness: Percentile Rank, Lower Bound of 90% Confidence Interval	GE.PER.RNK.LOWER	38.2514	36.2694	32.3077	39.2857	40.3061	19.7044	30.8823	9.26829	6.31068	5.33981	8.13397	6.69857	7.58294	9.47867	8.53081	8.17308	7.69231	12.5	13.9423	14.4231	17.3077
Mauritania	MRT	Government Effectiveness: Percentile Rank, Upper Bound of 90% Confidence Interval	GE.PER.RNK.UPPER	60.6557	65.8031	64.6154	67.8571	71.4286	56.6502	57.8431	34.1463	34.9515	32.5243	35.8852	31.5789	31.2796	32.2275	27.9621	25	24.0385	36.0577	36.0577	37.9808	45.1923
Mauritania	MRT	Government Effectiveness: Standard Error	GE.STD.ERR	0.187618	0.254505	0.262622	0.2558	0.283093	0.252236	0.229187	0.194209	0.234741	0.222758	0.197157	0.204837	0.203767	0.200635	0.178916	0.189784	0.185853	0.18106	0.186714	0.189324	0.204887
Mauritania	MRT	Political Stability and Absence of Violence/Terrorism: Estimate	PV.EST	0.367951	0.352372	0.344208	0.380958	0.0597727	-0.165008	-0.230491	0.238642	-0.278342	-0.642189	-0.883718	-1.07617	-1.17368	-1.13399	-1.01476	-0.589508	-0.637801	-0.746968	-0.626859	-0.619991	-0.542217
Mauritania	MRT	Political Stability and Absence of Violence/Terrorism: Number of Sources	PV.NO.SRC	2	2	2	2	2	3	3	5	5	5	6	6	6	6	6	6	6	6	6	6	5
Mauritania	MRT	Political Stability and Absence of Violence/Terrorism: Percentile Rank	PV.PER.RNK	59.0425	59.5745	61.3757	60.3175	44.2211	38.8349	39.3204	53.6232	35.2657	24.5192	19.4313	14.218	13.7441	15.1659	17.5356	25.7143	23.3333	20.4762	24.7619	23.8095	26.1905
Mauritania	MRT	Political Stability and Absence of Violence/Terrorism: Percentile Rank, Lower Bound of 90% Confidence Interval	PV.PER.RNK.LOWER	31.9149	33.5106	32.2751	31.746	29.1457	23.301	24.2718	39.6135	23.6715	15.3846	11.3744	9.00474	5.21327	7.109	7.58294	15.2381	14.7619	11.4286	13.8095	13.3333	14.2857
Mauritania	MRT	Political Stability and Absence of Violence/Terrorism: Percentile Rank, Upper Bound of 90% Confidence Interval	PV.PER.RNK.UPPER	87.234	82.9787	82.5397	86.2434	67.3367	58.7379	55.3398	68.1159	48.3092	37.9808	30.3317	25.1185	21.801	21.801	25.1185	36.6667	35.7143	31.4286	37.1429	37.6191	42.3809
Mauritania	MRT	Political Stability and Absence of Violence/Terrorism: Standard Error	PV.STD.ERR	0.475315	0.435324	0.455642	0.438637	0.350438	0.331348	0.333871	0.290218	0.273851	0.274511	0.261588	0.254323	0.254975	0.236768	0.242342	0.207291	0.215962	0.221378	0.230502	0.228316	0.248151
Mauritania	MRT	Regulatory Quality: Estimate	RQ.EST	-0.401736	-0.506606	-0.373882	0.338653	-0.0466674	-0.057796	-0.372204	-0.430267	-0.458438	-0.644522	-0.684983	-0.827969	-0.781344	-0.636884	-0.654506	-0.806669	-0.869483	-0.743002	-0.775995	-0.810981	-0.75934
Mauritania	MRT	Regulatory Quality: Number of Sources	RQ.NO.SRC	2	4	4	4	4	5	6	8	8	8	9	9	9	9	9	9	9	9	9	9	8
Mauritania	MRT	Regulatory Quality: Percentile Rank	RQ.PER.RNK	35.8696	28.4974	34.8718	64.2857	53.5714	52.2167	43.1373	37.7451	33.9806	28.6408	26.3158	22.9665	23.6967	28.436	27.4882	24.0385	20.6731	24.0385	23.0769	19.2308	22.1154
Mauritania	MRT	Regulatory Quality: Percentile Rank, Lower Bound of 90% Confidence Interval	RQ.PER.RNK.LOWER	16.3043	14.5078	18.4615	49.4898	39.2857	38.9163	25.4902	22.549	21.8447	16.9903	17.7034	13.3971	14.218	20.3791	18.0095	11.0577	11.0577	12.5	11.5385	11.5385	11.5385
Mauritania	MRT	Regulatory Quality: Percentile Rank, Upper Bound of 90% Confidence Interval	RQ.PER.RNK.UPPER	61.9565	52.8497	56.9231	74.4898	64.7959	64.532	51.9608	50.9804	50.9709	42.7184	37.799	32.5359	34.5972	40.2844	38.3886	32.6923	30.2885	35.0962	32.2115	32.6923	35.0962
Mauritania	MRT	Regulatory Quality: Standard Error	RQ.STD.ERR	0.35866	0.29647	0.276275	0.280681	0.233198	0.225632	0.175459	0.190857	0.190627	0.184601	0.170147	0.167977	0.165229	0.184501	0.179966	0.185744	0.17954	0.185188	0.182773	0.181719	0.18482
Mauritania	MRT	Rule of Law: Estimate	RL.EST	-0.503623	-0.481684	-0.423626	-0.523495	-0.524478	-0.72858	-0.711111	-0.784649	-0.703096	-1.14111	-0.804682	-0.889542	-0.915251	-0.917475	-0.998455	-0.860369	-0.866077	-0.726432	-0.59929	-0.68591	-0.582718
Mauritania	MRT	Rule of Law: Number of Sources	RL.NO.SRC	4	6	6	6	7	9	10	13	13	13	14	14	14	14	15	13	13	12	12	12	11
Mauritania	MRT	Rule of Law: Percentile Rank	RL.PER.RNK	35.6784	35.5	38.1188	36.1386	35.6436	27.7512	29.1866	25.3589	27.7512	12.0192	22.7488	21.327	18.3099	19.2488	15.9624	19.7115	18.75	25.9615	31.25	26.4423	28.8462
Mauritania	MRT	Rule of Law: Percentile Rank, Lower Bound of 90% Confidence Interval	RL.PER.RNK.LOWER	17.5879	19.5	26.2376	18.8119	18.3168	14.8325	15.7895	13.8756	15.311	5.76923	15.1659	12.7962	13.615	10.3286	10.3286	11.5385	11.5385	16.3462	20.1923	16.8269	19.7115
Mauritania	MRT	Rule of Law: Percentile Rank, Upper Bound of 90% Confidence Interval	RL.PER.RNK.UPPER	52.7638	49.5	49.0099	49.0099	48.0198	40.1914	40.6699	38.2775	41.6268	20.6731	34.5972	30.3317	29.108	29.5775	25.3521	31.25	30.7692	34.1346	40.8654	35.0962	42.7885
Mauritania	MRT	Rule of Law: Standard Error	RL.STD.ERR	0.320348	0.268078	0.239995	0.241982	0.23401	0.21384	0.203589	0.167482	0.172242	0.164284	0.142445	0.139384	0.134323	0.139044	0.135731	0.14623	0.147713	0.164708	0.154791	0.149632	0.155742
Mauritania	MRT	Voice and Accountability: Estimate	VA.EST	-0.56777	-0.7114	-0.789924	-0.793844	-0.764577	-1.13142	-0.912762	-0.851903	-0.666273	-0.942664	-0.924539	-0.909266	-0.927596	-0.910916	-0.95942	-0.895423	-0.887887	-0.772699	-0.799728	-0.853396	-0.780214
Mauritania	MRT	Voice and Accountability: Number of Sources	VA.NO.SRC	4	4	5	6	6	8	10	14	14	14	14	14	14	14	15	11	11	11	11	11	10
Mauritania	MRT	Voice and Accountability: Percentile Rank	VA.PER.RNK	33.5	29.3532	24.8756	25.8707	26.3682	17.7885	22.5962	25.4808	29.3269	21.6346	21.801	22.7488	21.5962	21.5962	21.1268	22.1675	23.6453	24.6305	24.1379	24.1379	25.1231
Mauritania	MRT	Voice and Accountability: Percentile Rank, Lower Bound of 90% Confidence Interval	VA.PER.RNK.LOWER	16.5	13.9304	12.9353	14.9254	16.9154	8.17308	13.4615	18.75	24.5192	15.3846	14.6919	15.6398	15.0235	15.493	15.0235	16.7488	19.2118	22.1675	21.6749	18.7192	21.1823
Mauritania	MRT	Voice and Accountability: Percentile Rank, Upper Bound of 90% Confidence Interval	VA.PER.RNK.UPPER	45	41.791	35.8209	35.8209	37.3134	23.0769	27.4038	28.8462	33.1731	25.9615	28.436	27.9621	26.7606	26.7606	25.3521	27.5862	27.5862	31.0345	31.0345	30.0493	30.0493
Mauritania	MRT	Voice and Accountability: Standard Error	VA.STD.ERR	0.261457	0.25609	0.235383	0.211364	0.208357	0.187342	0.167914	0.117944	0.119969	0.115724	0.118018	0.115548	0.117088	0.11992	0.112896	0.133135	0.132212	0.129502	0.130508	0.137214	0.128386
Morocco	MAR	Control of Corruption: Estimate	CC.EST	-0.106927	0.110848	-0.109731	-0.187592	-0.260044	-0.143284	-0.307885	-0.408489	-0.344908	-0.382435	-0.325605	-0.204909	-0.400819	-0.436757	-0.371114	-0.265682	-0.220341	-0.129715	-0.140288	-0.217327	-0.276536
Morocco	MAR	Control of Corruption: Number of Sources	CC.NO.SRC	4	6	6	7	9	10	10	13	13	14	14	14	15	16	16	15	14	13	14	14	14
Morocco	MAR	Control of Corruption: Percentile Rank	CC.PER.RNK	53.2258	60.8247	54.3147	50.505	47.9798	52.6829	47.3171	39.5122	44.6602	41.7476	45.4545	52.8571	42.1801	39.8104	44.0758	50	52.4038	53.8462	52.4038	47.5962	45.6731
Morocco	MAR	Control of Corruption: Percentile Rank, Lower Bound of 90% Confidence Interval	CC.PER.RNK.LOWER	34.9462	48.9691	36.5482	36.8687	34.8485	40.4878	34.6341	30.2439	32.5243	31.068	32.0574	39.0476	28.9099	29.3839	34.1232	36.5385	40.8654	43.2692	44.2308	39.9038	34.1346
Morocco	MAR	Control of Corruption: Percentile Rank, Upper Bound of 90% Confidence Interval	CC.PER.RNK.UPPER	63.4409	69.0722	63.9594	60.6061	58.5859	58.0488	55.6098	52.6829	54.8544	53.8835	56.4593	60	54.0284	51.6588	54.0284	55.2885	57.2115	59.6154	58.6538	57.2115	54.3269
Morocco	MAR	Control of Corruption: Standard Error	CC.STD.ERR	0.262077	0.211729	0.220008	0.183226	0.17956	0.16454	0.165553	0.14885	0.154227	0.152233	0.157689	0.155452	0.149098	0.134911	0.133506	0.13154	0.135199	0.137273	0.125473	0.127821	0.136662
Morocco	MAR	Government Effectiveness: Estimate	GE.EST	-0.104411	-0.0034133	-0.0741051	-0.147584	-0.137936	-0.12608	-0.279851	-0.155644	-0.170451	-0.175602	-0.140478	-0.104163	-0.151642	-0.0591652	-0.0351245	-0.0745343	-0.06205	-0.106201	-0.193549	-0.209296	-0.119225
Morocco	MAR	Government Effectiveness: Number of Sources	GE.NO.SRC	3	5	5	7	7	8	8	10	10	10	10	10	10	11	12	12	11	11	12	12	12
Morocco	MAR	Government Effectiveness: Percentile Rank	GE.PER.RNK	55.1913	58.0311	54.359	51.0204	53.0612	53.202	46.5686	51.2195	50.9709	48.5437	50.7177	50.2392	48.8152	52.6066	54.0284	50.4808	50.9615	49.5192	45.1923	46.6346	47.5962
Morocco	MAR	Government Effectiveness: Percentile Rank, Lower Bound of 90% Confidence Interval	GE.PER.RNK.LOWER	38.2514	44.0414	41.0256	39.2857	40.3061	43.3498	34.3137	38.5366	36.4078	38.3495	40.1914	41.1483	39.3365	43.128	45.4976	40.8654	41.3462	39.4231	34.1346	34.1346	36.0577
Morocco	MAR	Government Effectiveness: Percentile Rank, Upper Bound of 90% Confidence Interval	GE.PER.RNK.UPPER	60.6557	64.7668	64.1026	61.7347	62.7551	63.0542	55.3922	59.0244	58.2524	58.2524	59.3301	62.201	60.6635	61.1374	61.6114	62.0192	62.5	60.5769	57.2115	55.2885	60.5769
Morocco	MAR	Government Effectiveness: Standard Error	GE.STD.ERR	0.173904	0.203155	0.211237	0.174319	0.177603	0.169681	0.171431	0.173147	0.193938	0.190993	0.185603	0.189236	0.198086	0.187805	0.170496	0.180167	0.177297	0.172622	0.176826	0.180599	0.188435
Morocco	MAR	Political Stability and Absence of Violence/Terrorism: Estimate	PV.EST	-0.207399	0.30859	-0.0655948	-0.264196	-0.40534	-0.312351	-0.555952	-0.461175	-0.500055	-0.570645	-0.397728	-0.383013	-0.392257	-0.470459	-0.493018	-0.446266	-0.341487	-0.312574	-0.373956	-0.336377	-0.369398
Morocco	MAR	Political Stability and Absence of Violence/Terrorism: Number of Sources	PV.NO.SRC	4	4	4	5	5	6	6	7	7	7	7	7	7	8	8	8	8	8	8	8	7
Morocco	MAR	Political Stability and Absence of Violence/Terrorism: Percentile Rank	PV.PER.RNK	39.8936	57.4468	41.7989	37.037	32.1608	35.4369	29.1262	30.9179	27.5362	25.9615	31.2796	32.7014	33.6493	32.7014	28.9099	29.5238	33.8095	34.2857	30.9524	35.2381	32.3809
Morocco	MAR	Political Stability and Absence of Violence/Terrorism: Percentile Rank, Lower Bound of 90% Confidence Interval	PV.PER.RNK.LOWER	21.2766	34.5745	26.455	23.8095	21.608	21.8447	16.9903	19.8068	18.3575	15.8654	19.9052	22.2749	20.3791	20.3791	19.4313	20.9524	21.9048	22.8571	20	21.9048	19.5238
Morocco	MAR	Political Stability and Absence of Violence/Terrorism: Percentile Rank, Upper Bound of 90% Confidence Interval	PV.PER.RNK.UPPER	60.1064	76.0638	68.254	51.8518	46.2312	50.9709	42.233	42.9952	39.6135	38.4615	44.5498	46.4455	47.8673	40.7583	41.7062	40.9524	45.2381	47.6191	45.7143	46.6667	48.0952
Morocco	MAR	Political Stability and Absence of Violence/Terrorism: Standard Error	PV.STD.ERR	0.373857	0.345463	0.342809	0.301078	0.292475	0.287286	0.278669	0.253119	0.244181	0.246403	0.246402	0.243547	0.245539	0.221984	0.22802	0.196386	0.202983	0.207796	0.215911	0.214933	0.233699
Morocco	MAR	Regulatory Quality: Estimate	RQ.EST	-0.102564	-0.0232374	-0.0335292	-0.139191	-0.265645	-0.24735	-0.410484	-0.183422	-0.216379	-0.188039	-0.0602428	-0.0808093	-0.117086	-0.0831831	-0.116067	-0.130392	-0.170745	-0.234951	-0.228113	-0.285525	-0.211528
Morocco	MAR	Regulatory Quality: Number of Sources	RQ.NO.SRC	4	6	6	8	8	9	9	10	10	10	10	10	10	12	12	12	12	12	11	11	11
Morocco	MAR	Regulatory Quality: Percentile Rank	RQ.PER.RNK	51.6304	52.8497	52.3077	49.4898	45.4082	46.798	40.1961	49.5098	49.0291	49.0291	51.6746	50.7177	50.237	50.237	48.3412	49.5192	49.0385	45.1923	44.7115	42.7885	46.1538
Morocco	MAR	Regulatory Quality: Percentile Rank, Lower Bound of 90% Confidence Interval	RQ.PER.RNK.LOWER	25	29.5337	32.3077	35.7143	30.102	31.5271	25.4902	34.3137	31.5534	35.4369	41.1483	40.6699	36.9668	39.3365	37.4408	37.5	36.5385	32.2115	32.2115	30.2885	34.1346
Morocco	MAR	Regulatory Quality: Percentile Rank, Upper Bound of 90% Confidence Interval	RQ.PER.RNK.UPPER	64.6739	66.3212	65.1282	59.6939	54.5918	55.665	49.5098	55.3922	55.3398	54.8544	56.9378	56.4593	55.4502	56.3981	56.872	55.2885	54.8077	53.8462	57.2115	54.3269	57.2115
Morocco	MAR	Regulatory Quality: Standard Error	RQ.STD.ERR	0.311746	0.269265	0.249092	0.204872	0.177445	0.174058	0.156505	0.174777	0.174263	0.170774	0.1633	0.162988	0.159269	0.160263	0.158547	0.163206	0.158776	0.160808	0.165856	0.16448	0.164172
Morocco	MAR	Rule of Law: Estimate	RL.EST	0.221231	0.232518	0.129317	-0.0203135	-0.075726	-0.0325502	-0.164906	-0.289713	-0.298718	-0.303349	-0.210024	-0.171846	-0.227677	-0.209178	-0.24795	-0.0651447	-0.0889452	-0.158313	-0.162154	-0.138685	-0.135649
Morocco	MAR	Rule of Law: Number of Sources	RL.NO.SRC	6	8	9	11	12	13	13	15	15	16	16	16	17	18	18	16	15	14	15	15	15
Morocco	MAR	Rule of Law: Percentile Rank	RL.PER.RNK	59.2965	60.5	54.9505	52.9703	50.495	51.1962	45.933	46.4115	46.4115	46.6346	48.3412	50.237	48.8263	48.8263	46.9484	54.3269	54.8077	48.5577	48.5577	49.5192	48.5577
Morocco	MAR	Rule of Law: Percentile Rank, Lower Bound of 90% Confidence Interval	RL.PER.RNK.LOWER	47.2362	47	46.0396	44.5545	43.0693	43.0622	39.7129	37.3206	34.9282	36.0577	40.7583	42.1801	41.784	42.2535	41.3145	44.2308	44.7115	36.0577	39.4231	40.8654	41.3462
Morocco	MAR	Rule of Law: Percentile Rank, Upper Bound of 90% Confidence Interval	RL.PER.RNK.UPPER	65.8291	69.5	64.3564	59.901	60.8911	59.3301	55.9809	52.6316	52.6316	52.8846	54.9763	56.3981	53.9906	55.3991	53.5211	62.9808	60.0962	56.7308	56.25	56.7308	56.7308
Morocco	MAR	Rule of Law: Standard Error	RL.STD.ERR	0.212429	0.209898	0.175046	0.174025	0.177811	0.161742	0.156774	0.146618	0.148508	0.141122	0.138317	0.135978	0.13054	0.130855	0.128346	0.138334	0.140269	0.153363	0.143516	0.138701	0.140915
Morocco	MAR	Voice and Accountability: Estimate	VA.EST	-0.416847	-0.243398	-0.449144	-0.465829	-0.752867	-0.508275	-0.687105	-0.712467	-0.707482	-0.758324	-0.745736	-0.69859	-0.709957	-0.605667	-0.69858	-0.686271	-0.628307	-0.620477	-0.667624	-0.659232	-0.626805
Morocco	MAR	Voice and Accountability: Number of Sources	VA.NO.SRC	6	6	7	10	11	13	14	16	16	17	17	17	18	19	19	15	14	13	14	14	13
Morocco	MAR	Voice and Accountability: Percentile Rank	VA.PER.RNK	36.5	42.7861	34.3284	34.8259	26.8657	33.6538	26.4423	28.8462	27.8846	25.9615	27.9621	28.9099	27.6995	29.108	27.23	27.5862	28.5714	29.5567	28.5714	30.0493	29.5567
Morocco	MAR	Voice and Accountability: Percentile Rank, Lower Bound of 90% Confidence Interval	VA.PER.RNK.LOWER	24	32.3383	25.3731	26.8657	21.393	25.4808	22.1154	23.5577	23.0769	21.6346	21.327	23.6967	23.9437	24.8826	23.9437	22.1675	24.6305	23.6453	23.6453	23.6453	24.1379
Morocco	MAR	Voice and Accountability: Percentile Rank, Upper Bound of 90% Confidence Interval	VA.PER.RNK.UPPER	49	52.7363	47.2637	42.7861	32.3383	39.9038	33.6538	31.25	32.6923	29.3269	29.8578	30.8057	30.5164	34.2723	30.5164	31.5271	31.0345	32.5123	32.0197	33.0049	33.9901
Morocco	MAR	Voice and Accountability: Standard Error	VA.STD.ERR	0.20881	0.214446	0.197283	0.156962	0.148451	0.13771	0.138627	0.113799	0.115558	0.109347	0.111259	0.109906	0.108095	0.107736	0.103857	0.120154	0.121976	0.119777	0.119809	0.124366	0.118309
Oman	OMN	Control of Corruption: Estimate	CC.EST	0.414642	0.756063	0.797525	0.934627	0.590148	0.67339	0.394656	0.352166	0.350805	0.515381	0.332337	0.323707	0.139554	0.182281	0.159496	0.310048	0.268914	0.339484	0.24762	0.246132	0.452129
Oman	OMN	Control of Corruption: Number of Sources	CC.NO.SRC	4	4	4	5	4	4	5	5	6	6	7	7	7	7	7	7	7	7	6	6	7
Oman	OMN	Control of Corruption: Percentile Rank	CC.PER.RNK	67.7419	77.3196	78.1726	81.8182	75.2525	75.1219	66.8293	67.3171	68.4466	72.3301	67.9426	66.1905	62.0853	63.0332	63.0332	65.3846	64.9039	66.3461	63.4615	62.5	67.3077
Oman	OMN	Control of Corruption: Percentile Rank, Lower Bound of 90% Confidence Interval	CC.PER.RNK.LOWER	56.9892	67.5258	67.0051	74.7475	62.1212	63.9024	58.0488	56.5854	57.767	62.1359	59.3301	58.5714	54.0284	56.3981	54.5024	57.6923	57.2115	59.1346	56.7308	56.25	60.5769
Oman	OMN	Control of Corruption: Percentile Rank, Upper Bound of 90% Confidence Interval	CC.PER.RNK.UPPER	77.4194	84.0206	85.2792	85.8586	81.8182	83.4146	73.6585	74.1463	74.2718	77.1845	72.7273	72.3809	69.6682	70.1422	68.7204	70.6731	68.2692	70.1923	68.2692	69.2308	75.9615
Oman	OMN	Control of Corruption: Standard Error	CC.STD.ERR	0.262077	0.231376	0.256956	0.199504	0.24126	0.233554	0.199913	0.218519	0.199577	0.195888	0.181021	0.178578	0.174216	0.169069	0.170953	0.162059	0.161205	0.16742	0.155517	0.170589	0.176349
Oman	OMN	Government Effectiveness: Estimate	GE.EST	0.439419	0.449359	0.316872	0.391808	0.498728	0.484034	0.326232	0.312265	0.335464	0.419509	0.38391	0.377855	0.25122	0.264541	0.214115	0.265803	0.0814258	0.191946	0.192915	0.186578	0.259309
Oman	OMN	Government Effectiveness: Number of Sources	GE.NO.SRC	3	3	3	4	3	3	4	4	5	5	6	6	7	7	7	7	6	6	5	5	6
Oman	OMN	Government Effectiveness: Percentile Rank	GE.PER.RNK	65.5738	70.4663	65.1282	66.8367	70.9184	69.9507	63.2353	64.3902	64.5631	66.9903	66.0287	66.0287	62.5592	61.6114	61.1374	63.9423	55.7692	61.5385	60.5769	60.0962	62.5
Oman	OMN	Government Effectiveness: Percentile Rank, Lower Bound of 90% Confidence Interval	GE.PER.RNK.LOWER	59.5628	59.5855	53.3333	60.2041	62.2449	61.0837	55.3922	52.6829	52.4272	56.3107	56.4593	55.5024	50.7109	51.1848	48.3412	48.0769	42.7885	45.6731	44.2308	45.6731	46.6346
Oman	OMN	Government Effectiveness: Percentile Rank, Upper Bound of 90% Confidence Interval	GE.PER.RNK.UPPER	75.4098	78.2383	75.8974	75	77.551	78.8177	72.0588	75.1219	74.7573	77.1845	73.2057	75.1196	70.6161	70.1422	69.1943	72.5961	69.2308	72.5961	73.0769	73.5577	73.5577
Oman	OMN	Government Effectiveness: Standard Error	GE.STD.ERR	0.173904	0.228348	0.246868	0.198361	0.230661	0.245775	0.209733	0.265107	0.231543	0.240502	0.22369	0.22979	0.221818	0.220163	0.215414	0.23484	0.237137	0.225214	0.249272	0.252532	0.238684
Oman	OMN	Political Stability and Absence of Violence/Terrorism: Estimate	PV.EST	0.874473	0.855155	1.12252	0.926793	1.06124	1.11546	0.945717	0.840647	0.939024	0.92223	0.826635	0.590242	0.432441	0.462077	0.45953	0.734907	0.78334	0.760053	0.754208	0.65515	0.593485
Oman	OMN	Political Stability and Absence of Violence/Terrorism: Number of Sources	PV.NO.SRC	4	4	4	4	4	5	5	5	6	6	7	7	7	7	7	7	7	7	6	6	6
Oman	OMN	Political Stability and Absence of Violence/Terrorism: Percentile Rank	PV.PER.RNK	75	75.5319	83.0688	79.3651	84.9246	86.8932	78.6408	73.43	79.2271	79.3269	75.8294	65.8768	61.6114	61.6114	62.5592	70	71.4286	72.8571	71.9048	67.1429	67.1429
Oman	OMN	Political Stability and Absence of Violence/Terrorism: Percentile Rank, Lower Bound of 90% Confidence Interval	PV.PER.RNK.LOWER	54.7872	56.9149	69.8413	61.3757	64.3216	66.9903	61.1651	56.5217	61.8357	60.5769	60.6635	51.6588	48.8152	48.8152	48.8152	59.0476	60.4762	59.5238	60.4762	56.6667	54.2857
Oman	OMN	Political Stability and Absence of Violence/Terrorism: Percentile Rank, Upper Bound of 90% Confidence Interval	PV.PER.RNK.UPPER	99.4681	96.2766	98.9418	95.2381	99.4975	99.5146	99.0291	95.6522	98.5507	99.0385	92.4171	82.9384	71.0901	72.9858	72.0379	87.6191	89.5238	90.4762	89.5238	85.7143	82.8571
Oman	OMN	Political Stability and Absence of Violence/Terrorism: Standard Error	PV.STD.ERR	0.373857	0.345463	0.342809	0.316106	0.302047	0.293484	0.287461	0.279806	0.262606	0.264087	0.246402	0.243547	0.24425	0.226807	0.231508	0.200113	0.206815	0.212601	0.224583	0.223906	0.239387
Oman	OMN	Regulatory Quality: Estimate	RQ.EST	0.094098	-0.0300817	0.0810051	0.72236	0.706246	0.655456	0.550478	0.604931	0.613822	0.695889	0.527706	0.444548	0.323657	0.471573	0.4758	0.692389	0.57451	0.610466	0.420804	0.173304	0.292457
Oman	OMN	Regulatory Quality: Number of Sources	RQ.NO.SRC	4	4	4	5	4	4	5	5	6	6	7	7	7	7	7	7	7	7	6	6	7
Oman	OMN	Regulatory Quality: Percentile Rank	RQ.PER.RNK	58.6957	52.3316	57.4359	71.4286	71.9388	70.4433	65.6863	68.6274	69.4175	72.3301	66.9857	64.5933	61.1374	67.2986	67.7725	73.5577	71.6346	72.5961	68.2692	61.5385	64.4231
Oman	OMN	Regulatory Quality: Percentile Rank, Lower Bound of 90% Confidence Interval	RQ.PER.RNK.LOWER	33.6957	25.3886	32.3077	63.2653	65.3061	64.0394	60.2941	57.8431	58.7379	61.6505	56.9378	54.067	52.6066	55.4502	55.9242	62.9808	59.6154	62.5	57.2115	46.1538	51.4423
Oman	OMN	Regulatory Quality: Percentile Rank, Upper Bound of 90% Confidence Interval	RQ.PER.RNK.UPPER	69.5652	68.9119	71.7949	83.6735	80.6122	78.8177	72.549	77.451	79.1262	81.5534	75.1196	75.5981	73.4597	75.8294	75.8294	81.25	78.8461	80.7692	75.9615	71.6346	73.0769
Oman	OMN	Regulatory Quality: Standard Error	RQ.STD.ERR	0.311746	0.340724	0.315328	0.248517	0.216303	0.229465	0.172974	0.214281	0.21544	0.22103	0.201035	0.204822	0.203751	0.226034	0.223337	0.2317	0.223289	0.231666	0.2292	0.227744	0.220838
Oman	OMN	Rule of Law: Estimate	RL.EST	0.55016	0.450044	0.558062	0.471937	0.491311	0.522635	0.314848	0.294712	0.412377	0.593788	0.555269	0.542721	0.467974	0.523968	0.492018	0.485808	0.376886	0.407917	0.432476	0.464404	0.554404
Oman	OMN	Rule of Law: Number of Sources	RL.NO.SRC	6	6	6	7	6	7	8	8	9	9	10	10	10	10	10	9	9	8	7	7	8
Oman	OMN	Rule of Law: Percentile Rank	RL.PER.RNK	65.3266	67.5	67.3267	66.3366	65.8416	66.5072	59.8086	60.2871	61.7225	69.2308	65.8768	65.8768	63.8498	66.1972	65.7277	69.7115	65.8654	65.8654	65.8654	68.2692	70.6731
Oman	OMN	Rule of Law: Percentile Rank, Lower Bound of 90% Confidence Interval	RL.PER.RNK.LOWER	58.2915	54.5	59.901	57.9208	58.9109	59.3301	54.067	53.1101	57.8947	59.1346	61.6114	62.0853	60.5634	61.5023	59.6244	64.9039	59.1346	56.7308	58.1731	59.1346	61.0577
Oman	OMN	Rule of Law: Percentile Rank, Upper Bound of 90% Confidence Interval	RL.PER.RNK.UPPER	78.8945	75.5	77.2277	74.7525	76.2376	75.1196	68.421	66.9857	71.2919	78.8461	73.9337	73.9337	70.4225	72.7699	72.7699	76.9231	73.0769	75.4808	76.4423	75.9615	77.8846
Oman	OMN	Rule of Law: Standard Error	RL.STD.ERR	0.212429	0.224308	0.184623	0.197639	0.211993	0.199821	0.189786	0.196491	0.181833	0.177911	0.161868	0.161354	0.153433	0.161683	0.16334	0.177666	0.175571	0.195726	0.190613	0.181831	0.176834
Oman	OMN	Voice and Accountability: Estimate	VA.EST	-0.713683	-0.886453	-0.755833	-0.787837	-0.822545	-0.656645	-0.919638	-1.15949	-1.06266	-1.07074	-1.07404	-1.0448	-1.06049	-1.02167	-1.03864	-1.09071	-1.06145	-1.05436	-1.06124	-1.02585	-1.13628
Oman	OMN	Voice and Accountability: Number of Sources	VA.NO.SRC	6	6	6	7	7	7	8	8	9	10	11	11	10	10	10	8	8	8	7	7	7
Oman	OMN	Voice and Accountability: Percentile Rank	VA.PER.RNK	26	22.3881	26.8657	26.3682	25.3731	28.8462	22.1154	16.8269	17.7885	17.7885	16.1137	18.0095	18.7793	16.9014	17.3709	19.2118	20.6897	19.7044	19.2118	19.7044	17.2414
Oman	OMN	Voice and Accountability: Percentile Rank, Lower Bound of 90% Confidence Interval	VA.PER.RNK.LOWER	16.5	12.4378	14.9254	15.9204	16.4179	21.6346	13.4615	8.65385	10.0961	12.5	11.3744	13.2701	12.6761	14.554	13.615	10.8374	12.8079	12.8079	12.8079	13.3005	12.8079
Oman	OMN	Voice and Accountability: Percentile Rank, Upper Bound of 90% Confidence Interval	VA.PER.RNK.UPPER	37.5	33.3333	35.3234	34.3284	32.3383	36.5385	26.9231	21.6346	25	24.5192	24.1706	25.5924	25.3521	24.8826	24.4132	23.6453	24.6305	23.6453	23.6453	25.6158	22.6601
Oman	OMN	Voice and Accountability: Standard Error	VA.STD.ERR	0.20881	0.214446	0.207886	0.194948	0.191659	0.169653	0.162438	0.142421	0.140473	0.137426	0.134066	0.13027	0.134935	0.132096	0.129085	0.138632	0.137859	0.132868	0.134072	0.140078	0.1322
Tunisia	TUN	Control of Corruption: Estimate	CC.EST	-0.533678	-0.238009	-0.23122	0.369942	0.159738	0.0828652	-0.257894	-0.189283	-0.249607	-0.303903	-0.220963	-0.258794	-0.0567588	-0.0597201	-0.0670398	-0.0368847	-0.0688108	-0.134845	-0.108679	-0.0536738	-0.0770505
Tunisia	TUN	Control of Corruption: Number of Sources	CC.NO.SRC	4	6	6	7	8	10	10	11	11	12	12	12	13	14	16	15	15	15	14	15	15
Tunisia	TUN	Control of Corruption: Percentile Rank	CC.PER.RNK	35.4839	48.9691	48.2234	68.6869	61.6162	57.0732	49.7561	52.1951	49.5146	47.5728	51.6746	48.5714	56.3981	56.872	56.872	55.7692	55.7692	53.3654	53.8462	56.25	52.8846
Tunisia	TUN	Control of Corruption: Percentile Rank, Lower Bound of 90% Confidence Interval	CC.PER.RNK.LOWER	17.7419	32.4742	32.4873	59.596	55.0505	51.2195	37.561	38.5366	36.4078	34.466	37.799	36.6667	48.8152	47.3934	46.9194	50	47.5962	43.2692	44.7115	45.6731	44.2308
Tunisia	TUN	Control of Corruption: Percentile Rank, Upper Bound of 90% Confidence Interval	CC.PER.RNK.UPPER	53.2258	60.3093	61.4213	76.2626	71.7172	65.8537	56.0976	59.0244	57.767	55.8252	59.3301	56.6667	63.5071	62.5592	62.5592	60.5769	61.5385	59.6154	59.1346	60.5769	60.5769
Tunisia	TUN	Control of Corruption: Standard Error	CC.STD.ERR	0.262077	0.211729	0.220008	0.183226	0.17957	0.16454	0.165553	0.153358	0.15778	0.154619	0.160668	0.158028	0.150343	0.139271	0.133506	0.13154	0.133618	0.135461	0.129134	0.127264	0.135945
Tunisia	TUN	Government Effectiveness: Estimate	GE.EST	0.375723	0.532296	0.495972	0.5827	0.508504	0.436589	0.381882	0.643524	0.468667	0.30885	0.381387	0.218426	0.0226407	-0.0344481	-0.0735112	-0.119646	-0.120279	-0.229003	-0.0816317	-0.105262	-0.102274
Tunisia	TUN	Government Effectiveness: Number of Sources	GE.NO.SRC	3	5	5	7	7	8	8	9	10	10	10	10	11	10	12	12	12	12	11	12	12
Tunisia	TUN	Government Effectiveness: Percentile Rank	GE.PER.RNK	62.8415	72.5389	71.282	72.449	71.4286	68.4729	64.7059	72.1951	67.9612	66.0194	65.5502	63.1579	55.4502	54.9763	52.1327	48.0769	49.0385	44.2308	50.4808	48.5577	48.5577
Tunisia	TUN	Government Effectiveness: Percentile Rank, Lower Bound of 90% Confidence Interval	GE.PER.RNK.LOWER	57.9235	61.658	62.0513	64.2857	64.2857	63.0542	57.8431	64.8781	58.2524	55.8252	57.4163	50.7177	45.4976	43.128	44.0758	39.4231	39.9038	35.5769	37.0192	38.9423	36.5385
Tunisia	TUN	Government Effectiveness: Percentile Rank, Upper Bound of 90% Confidence Interval	GE.PER.RNK.UPPER	74.8634	79.2746	80	78.0612	77.0408	75.8621	72.0588	79.0244	77.6699	73.301	72.7273	68.8995	63.981	62.5592	60.6635	60.5769	60.0962	54.8077	61.5385	60.5769	61.0577
Tunisia	TUN	Government Effectiveness: Standard Error	GE.STD.ERR	0.173904	0.203155	0.211237	0.174319	0.177603	0.169681	0.171431	0.174123	0.193938	0.190993	0.185603	0.189236	0.187781	0.198362	0.170496	0.180167	0.175529	0.171102	0.185618	0.180599	0.188435
Tunisia	TUN	Political Stability and Absence of Violence/Terrorism: Estimate	PV.EST	0.263159	0.265037	0.324508	0.151466	0.319451	0.148605	0.0238121	0.210724	0.159467	0.102305	0.0617746	-0.0639764	-0.353742	-0.721317	-0.902563	-0.851661	-0.960387	-1.14133	-1.02453	-0.859308	-0.832536
Tunisia	TUN	Political Stability and Absence of Violence/Terrorism: Number of Sources	PV.NO.SRC	4	4	4	5	5	6	6	7	7	7	7	7	7	7	8	8	8	8	8	8	7
Tunisia	TUN	Political Stability and Absence of Violence/Terrorism: Percentile Rank	PV.PER.RNK	55.3192	55.3192	59.7884	50.2645	57.2864	50	47.5728	52.657	48.3092	48.0769	46.9194	43.6019	35.545	22.2749	18.9574	18.5714	16.6667	11.4286	13.8095	17.1429	17.1429
Tunisia	TUN	Political Stability and Absence of Violence/Terrorism: Percentile Rank, Lower Bound of 90% Confidence Interval	PV.PER.RNK.LOWER	34.0425	34.5745	36.5079	31.746	38.6935	34.466	33.9806	40.0966	37.1981	34.1346	32.7014	29.8578	22.2749	15.6398	10.4265	10	9.04762	8.57143	9.04762	11.4286	11.4286
Tunisia	TUN	Political Stability and Absence of Violence/Terrorism: Percentile Rank, Upper Bound of 90% Confidence Interval	PV.PER.RNK.UPPER	75	73.9362	77.2487	68.7831	71.8593	66.0194	61.6505	64.7343	63.7681	61.5385	61.6114	55.4502	48.8152	36.9668	27.4882	28.0952	23.3333	18.5714	23.3333	29.0476	28.5714
Tunisia	TUN	Political Stability and Absence of Violence/Terrorism: Standard Error	PV.STD.ERR	0.373857	0.345463	0.342809	0.301078	0.292475	0.287286	0.278669	0.253119	0.244181	0.246403	0.246402	0.243547	0.24425	0.227815	0.22802	0.196386	0.202983	0.207796	0.215911	0.214933	0.233699
Tunisia	TUN	Regulatory Quality: Estimate	RQ.EST	0.141709	-0.0163722	-0.0219359	-0.12139	0.0265805	-0.0925945	-0.0820463	0.107511	0.0327498	0.0570617	-0.0021409	-0.0303108	-0.192299	-0.188614	-0.331638	-0.382595	-0.405311	-0.470093	-0.411649	-0.51307	-0.437205
Tunisia	TUN	Regulatory Quality: Number of Sources	RQ.NO.SRC	4	6	6	8	8	9	9	10	10	10	10	10	10	11	12	12	12	12	10	11	11
Tunisia	TUN	Regulatory Quality: Percentile Rank	RQ.PER.RNK	60.8696	53.3679	53.8462	50	55.102	50.2463	52.451	55.8824	54.3689	54.8544	53.1101	52.6316	46.9194	46.4455	40.7583	39.4231	37.9808	33.1731	36.0577	32.6923	35.5769
Tunisia	TUN	Regulatory Quality: Percentile Rank, Lower Bound of 90% Confidence Interval	RQ.PER.RNK.LOWER	36.9565	30.0518	32.8205	36.2245	45.4082	39.9015	43.6275	49.5098	46.6019	47.0874	44.9761	41.6268	35.0711	35.545	30.8057	28.3654	28.3654	24.0385	25.9615	20.6731	23.5577
Tunisia	TUN	Regulatory Quality: Percentile Rank, Upper Bound of 90% Confidence Interval	RQ.PER.RNK.UPPER	70.6522	66.3212	65.1282	61.2245	64.2857	60.5911	57.3529	63.2353	62.1359	61.6505	58.8517	57.8947	54.5024	54.9763	50.237	49.5192	49.5192	46.6346	50.9615	43.2692	48.0769
Tunisia	TUN	Regulatory Quality: Standard Error	RQ.STD.ERR	0.311746	0.269265	0.249092	0.204872	0.177445	0.174058	0.156505	0.174777	0.174263	0.170774	0.1633	0.162988	0.162188	0.161771	0.158547	0.163206	0.158776	0.160808	0.180688	0.16448	0.164172
Tunisia	TUN	Rule of Law: Estimate	RL.EST	-0.303403	-0.23516	-0.215819	-0.121975	-0.143253	0.0473621	-0.0129396	0.113648	0.0857512	0.0725158	0.129553	0.06171	-0.132161	-0.129365	-0.189248	-0.109677	-0.0660858	-0.0031012	0.0615197	0.0391134	0.0622187
Tunisia	TUN	Rule of Law: Number of Sources	RL.NO.SRC	6	8	8	10	10	12	13	13	14	15	15	15	16	16	18	16	16	15	14	15	15
Tunisia	TUN	Rule of Law: Percentile Rank	RL.PER.RNK	41.206	43.5	43.5644	49.505	48.0198	55.5024	53.5885	56.4593	55.5024	55.2885	59.2417	57.346	50.7042	51.1737	49.2958	52.8846	55.2885	54.8077	55.7692	56.25	55.7692
Tunisia	TUN	Rule of Law: Percentile Rank, Lower Bound of 90% Confidence Interval	RL.PER.RNK.LOWER	30.6533	31	34.6535	40.099	40.5941	44.9761	44.9761	50.2392	49.2823	50.4808	52.6066	50.7109	44.6009	45.0704	42.2535	43.2692	45.6731	44.7115	48.0769	48.0769	47.5962
Tunisia	TUN	Rule of Law: Percentile Rank, Upper Bound of 90% Confidence Interval	RL.PER.RNK.UPPER	52.7638	55.5	54.4554	58.4158	59.4059	59.3301	58.8517	61.244	59.8086	59.1346	61.6114	62.0853	57.7465	57.7465	54.4601	61.5385	61.5385	59.6154	62.0192	62.0192	61.5385
Tunisia	TUN	Rule of Law: Standard Error	RL.STD.ERR	0.212429	0.209898	0.175605	0.175409	0.1799	0.162356	0.156774	0.147506	0.149069	0.142623	0.140097	0.137267	0.13142	0.135415	0.128346	0.138334	0.139598	0.152688	0.151842	0.138701	0.140915
Tunisia	TUN	Voice and Accountability: Estimate	VA.EST	-0.599356	-0.823301	-0.813736	-0.959111	-0.920871	-0.866649	-0.950093	-1.29792	-1.37891	-1.35055	-1.35834	-1.41616	-0.370504	-0.171652	-0.0844274	0.192784	0.241413	0.304584	0.16209	0.210776	0.281406
Tunisia	TUN	Voice and Accountability: Number of Sources	VA.NO.SRC	6	6	7	10	10	13	13	14	14	15	15	15	17	17	19	15	15	15	15	15	14
Tunisia	TUN	Voice and Accountability: Percentile Rank	VA.PER.RNK	31	24.3781	23.3831	20.8955	21.8906	22.5962	21.6346	9.61538	9.13462	10.5769	9.95261	9.00474	35.6808	43.662	45.0704	55.1724	55.665	56.1576	52.7094	53.6946	56.6502
Tunisia	TUN	Voice and Accountability: Percentile Rank, Lower Bound of 90% Confidence Interval	VA.PER.RNK.LOWER	19.5	13.4328	12.9353	13.4328	13.4328	18.2692	13.4615	8.17308	7.21154	7.69231	7.109	6.63507	30.0469	35.6808	39.9061	48.2759	48.7685	49.2611	44.335	46.3054	49.7537
Tunisia	TUN	Voice and Accountability: Percentile Rank, Upper Bound of 90% Confidence Interval	VA.PER.RNK.UPPER	41	34.8259	32.3383	26.8657	28.3582	28.8462	25	17.7885	13.9423	14.9039	13.7441	13.2701	41.3145	49.7653	52.1127	59.6059	61.5763	63.5468	57.6355	60.5911	61.0837
Tunisia	TUN	Voice and Accountability: Standard Error	VA.STD.ERR	0.20881	0.214446	0.197283	0.156962	0.156959	0.13771	0.142214	0.115769	0.117252	0.113122	0.11489	0.112778	0.112042	0.109107	0.103857	0.120154	0.121644	0.119457	0.119724	0.124262	0.11822
Saudi Arabia	SAU	Control of Corruption: Estimate	CC.EST	-0.163303	-0.25098	-0.189665	0.19874	-0.152232	-0.286973	-0.0974841	-0.190362	-0.165161	-0.0084042	-0.0165912	0.0405474	-0.30503	-0.0386107	-0.0204593	0.0873251	0.0521352	0.230904	0.363826	0.35976	0.274639
Saudi Arabia	SAU	Control of Corruption: Number of Sources	CC.NO.SRC	4	4	4	5	5	5	5	6	7	8	9	9	8	9	9	8	7	8	8	8	8
Saudi Arabia	SAU	Control of Corruption: Percentile Rank	CC.PER.RNK	51.0753	47.9381	50.7614	62.6263	55.0505	48.7805	54.6341	51.7073	53.3981	58.7379	58.8517	59.0476	48.8152	57.8199	59.2417	59.1346	58.6538	63.9423	65.8654	65.8654	62.9808
Saudi Arabia	SAU	Control of Corruption: Percentile Rank, Lower Bound of 90% Confidence Interval	CC.PER.RNK.LOWER	32.2581	31.4433	31.4721	53.5354	35.3535	29.2683	42.439	37.561	37.8641	48.5437	46.8899	50	32.7014	46.9194	46.9194	52.4038	52.4038	56.25	59.6154	59.6154	57.6923
Saudi Arabia	SAU	Control of Corruption: Percentile Rank, Upper Bound of 90% Confidence Interval	CC.PER.RNK.UPPER	62.9032	61.3402	63.4518	72.7273	62.1212	56.5854	60.9756	59.5122	59.7087	64.5631	65.5502	66.1905	57.346	63.0332	63.5071	65.8654	65.8654	67.3077	71.1539	72.1154	69.7115
Saudi Arabia	SAU	Control of Corruption: Standard Error	CC.STD.ERR	0.262077	0.231376	0.256956	0.199504	0.216381	0.209346	0.199913	0.187593	0.176416	0.172399	0.177634	0.174579	0.18116	0.166118	0.167937	0.16129	0.161205	0.156218	0.140573	0.152571	0.166146
Saudi Arabia	SAU	Government Effectiveness: Estimate	GE.EST	-0.183629	-0.20313	-0.219548	-0.302722	-0.304376	-0.356191	-0.374779	-0.170044	-0.119132	-0.0889558	-0.0964172	-0.0069224	-0.303007	0.0349834	0.0731393	0.207731	0.199934	0.261262	0.257239	0.323498	0.306445
Saudi Arabia	SAU	Government Effectiveness: Number of Sources	GE.NO.SRC	3	3	3	5	4	4	4	6	7	7	7	7	6	7	7	7	7	8	8	8	8
Saudi Arabia	SAU	Government Effectiveness: Percentile Rank	GE.PER.RNK	49.1803	50.2591	47.6923	45.9184	46.4286	45.8128	42.6471	49.7561	51.4563	52.9126	51.1962	55.5024	45.4976	58.2938	58.2938	62.0192	60.5769	63.4615	62.5	64.9039	64.4231
Saudi Arabia	SAU	Government Effectiveness: Percentile Rank, Lower Bound of 90% Confidence Interval	GE.PER.RNK.LOWER	36.0656	29.5337	28.7179	30.6122	28.5714	24.1379	27.451	34.1463	36.4078	38.8349	39.7129	41.6268	27.4882	44.0758	45.4976	45.6731	48.0769	50.4808	50	50.9615	50.9615
Saudi Arabia	SAU	Government Effectiveness: Percentile Rank, Upper Bound of 90% Confidence Interval	GE.PER.RNK.UPPER	57.9235	61.1399	62.5641	56.6326	59.1837	57.6355	55.3922	61.9512	62.6214	65.0486	62.201	65.5502	58.7678	64.455	65.8768	72.5961	73.0769	73.0769	73.0769	75	73.5577
Saudi Arabia	SAU	Government Effectiveness: Standard Error	GE.STD.ERR	0.173904	0.228348	0.246868	0.186423	0.213916	0.225894	0.209733	0.252343	0.224268	0.232747	0.221627	0.227007	0.239387	0.220163	0.215414	0.23484	0.233878	0.210645	0.213301	0.213245	0.219926
Saudi Arabia	SAU	Political Stability and Absence of Violence/Terrorism: Estimate	PV.EST	-0.187702	0.111408	0.226508	0.002478	0.141363	-0.655332	-0.243673	-0.523608	-0.466703	-0.33717	-0.491159	-0.226727	-0.4648	-0.480688	-0.431784	-0.285845	-0.626399	-0.464828	-0.580994	-0.552548	-0.427996
Saudi Arabia	SAU	Political Stability and Absence of Violence/Terrorism: Number of Sources	PV.NO.SRC	4	4	4	4	4	5	5	6	7	7	7	7	6	7	7	7	7	8	8	8	7
Saudi Arabia	SAU	Political Stability and Absence of Violence/Terrorism: Percentile Rank	PV.PER.RNK	40.9575	50.5319	55.5556	46.5609	49.2462	24.7573	38.8349	29.4686	28.5024	31.7308	28.9099	37.4408	31.2796	32.2275	32.7014	36.1905	23.8095	28.0952	25.7143	27.1429	29.5238
Saudi Arabia	SAU	Political Stability and Absence of Violence/Terrorism: Percentile Rank, Lower Bound of 90% Confidence Interval	PV.PER.RNK.LOWER	21.2766	30.3192	33.8624	28.5714	35.1759	15.0485	25.2427	17.8744	18.3575	20.1923	18.9574	25.5924	19.9052	20.3791	19.9052	24.7619	16.1905	17.6191	14.2857	14.7619	18.0952
Saudi Arabia	SAU	Political Stability and Absence of Violence/Terrorism: Percentile Rank, Upper Bound of 90% Confidence Interval	PV.PER.RNK.UPPER	60.1064	69.1489	74.0741	65.6085	67.3367	38.3495	54.3689	42.029	40.5797	46.6346	41.2322	51.6588	45.0237	40.2844	43.6019	47.6191	35.2381	41.4286	38.5714	39.5238	46.6667
Saudi Arabia	SAU	Political Stability and Absence of Violence/Terrorism: Standard Error	PV.STD.ERR	0.373857	0.345463	0.342809	0.316106	0.302047	0.293484	0.287461	0.257524	0.244181	0.246403	0.246402	0.243547	0.249336	0.226807	0.231508	0.200113	0.206815	0.209563	0.216697	0.215539	0.233092
Saudi Arabia	SAU	Regulatory Quality: Estimate	RQ.EST	-0.308262	-0.267662	-0.103355	-0.045104	0.113586	0.0499324	0.114249	-0.0447374	0.018983	0.12007	0.160721	0.161231	0.0281195	0.103154	0.0827896	-0.003618	0.0251311	0.0793312	-0.0008548	-0.0757623	-0.0681949
Saudi Arabia	SAU	Regulatory Quality: Number of Sources	RQ.NO.SRC	4	4	4	6	5	5	5	6	7	7	7	7	6	7	7	7	7	8	8	8	8
Saudi Arabia	SAU	Regulatory Quality: Percentile Rank	RQ.PER.RNK	41.3043	39.8964	49.7436	53.0612	57.6531	56.1576	56.8627	53.4314	53.8835	55.3398	56.9378	55.9809	53.5545	55.9242	54.9763	53.8462	54.3269	55.7692	54.8077	51.9231	51.9231
Saudi Arabia	SAU	Regulatory Quality: Percentile Rank, Lower Bound of 90% Confidence Interval	RQ.PER.RNK.LOWER	22.8261	18.6529	24.6154	38.2653	47.9592	45.3202	49.0196	40.6863	41.7476	47.0874	47.8469	46.4115	41.7062	43.6019	44.5498	38.4615	42.3077	43.75	38.4615	36.0577	36.5385
Saudi Arabia	SAU	Regulatory Quality: Percentile Rank, Upper Bound of 90% Confidence Interval	RQ.PER.RNK.UPPER	61.9565	63.2124	66.1539	63.7755	66.8367	64.532	62.7451	59.8039	62.1359	64.0777	66.0287	67.9426	61.6114	67.2986	65.4029	65.3846	66.3461	67.7885	65.8654	63.4615	63.9423
Saudi Arabia	SAU	Regulatory Quality: Standard Error	RQ.STD.ERR	0.311746	0.340724	0.315328	0.225448	0.195179	0.206113	0.172974	0.208104	0.209356	0.214302	0.201035	0.204822	0.208131	0.226034	0.223337	0.2317	0.223289	0.21842	0.211822	0.212063	0.211487
Saudi Arabia	SAU	Rule of Law: Estimate	RL.EST	0.114563	0.0678226	-0.150683	-0.000601	0.130477	0.0203347	-0.014788	0.0186294	0.0772642	0.0746007	0.0502953	0.155001	0.0515942	0.148859	0.157214	0.132184	0.117817	0.337608	0.0989601	0.141409	0.168556
Saudi Arabia	SAU	Rule of Law: Number of Sources	RL.NO.SRC	6	6	7	9	8	8	8	10	11	11	12	12	11	12	12	10	9	9	9	10	10
Saudi Arabia	SAU	Rule of Law: Percentile Rank	RL.PER.RNK	56.2814	54.5	47.5247	53.4654	58.4158	53.1101	53.1101	54.5455	55.0239	56.25	56.3981	60.1896	56.8075	59.6244	58.6855	62.5	60.0962	62.5	57.2115	58.6538	58.6538
Saudi Arabia	SAU	Rule of Law: Percentile Rank, Lower Bound of 90% Confidence Interval	RL.PER.RNK.LOWER	43.2161	41.5	37.6238	44.0594	47.0297	43.0622	43.5407	46.4115	48.3254	49.0385	47.8673	51.6588	49.2958	51.6432	51.6432	50.4808	50	55.2885	48.0769	50	50.4808
Saudi Arabia	SAU	Rule of Law: Percentile Rank, Upper Bound of 90% Confidence Interval	RL.PER.RNK.UPPER	63.3166	67	56.4356	60.396	65.3465	60.2871	58.8517	60.2871	60.2871	59.6154	61.6114	62.5592	61.9718	63.3803	63.3803	68.2692	66.3461	74.0385	63.4615	65.3846	65.3846
Saudi Arabia	SAU	Rule of Law: Standard Error	RL.STD.ERR	0.212429	0.224308	0.183974	0.187699	0.202526	0.193818	0.189786	0.179354	0.167894	0.164002	0.159327	0.158033	0.15487	0.157395	0.159051	0.177245	0.175571	0.182303	0.171773	0.164036	0.168376
Saudi Arabia	SAU	Voice and Accountability: Estimate	VA.EST	-1.49903	-1.61757	-1.60268	-1.70285	-1.64427	-1.32374	-1.53632	-1.78147	-1.70515	-1.72997	-1.82226	-1.78806	-1.9072	-1.86564	-1.87641	-1.88201	-1.8427	-1.72751	-1.67398	-1.64228	-1.61692
Saudi Arabia	SAU	Voice and Accountability: Number of Sources	VA.NO.SRC	6	6	6	9	8	9	9	11	13	13	14	14	12	13	13	10	9	10	10	10	9
Saudi Arabia	SAU	Voice and Accountability: Percentile Rank	VA.PER.RNK	9	5.47264	5.97015	3.9801	5.47264	10.0961	6.25	3.84615	5.76923	4.32692	3.31754	3.79147	2.34742	2.8169	2.8169	2.95567	3.44828	4.92611	5.91133	5.91133	5.91133
Saudi Arabia	SAU	Voice and Accountability: Percentile Rank, Lower Bound of 90% Confidence Interval	VA.PER.RNK.LOWER	2.5	0.497512	1.49254	0.995025	1.49254	5.76923	2.88462	1.92308	2.40385	1.92308	2.36967	2.36967	1.40845	1.40845	1.40845	1.47783	0.985222	1.97044	1.97044	1.97044	2.95567
Saudi Arabia	SAU	Voice and Accountability: Percentile Rank, Upper Bound of 90% Confidence Interval	VA.PER.RNK.UPPER	14.5	11.9403	11.9403	9.45274	9.95025	18.2692	10.5769	6.73077	8.17308	7.69231	6.16114	6.63507	4.22535	3.75587	3.75587	4.4335	4.92611	7.88177	8.37438	9.85222	10.8374
Saudi Arabia	SAU	Voice and Accountability: Standard Error	VA.STD.ERR	0.20881	0.214446	0.207886	0.164575	0.169629	0.154907	0.159625	0.134402	0.130473	0.12994	0.115474	0.113061	0.117929	0.119976	0.116639	0.13653	0.135997	0.13136	0.132013	0.138029	0.130722
Data from database: Worldwide Governance Indicators
Last Updated: 09/28/2020

## Sheet: Feuil1
Country Name	Algeria	Algeria	Algeria	Algeria	Algeria	Algeria	Bahrain	Bahrain	Bahrain	Bahrain	Bahrain	Bahrain	Egypt, Arab Rep.	Egypt, Arab Rep.	Egypt, Arab Rep.	Egypt, Arab Rep.	Egypt, Arab Rep.	Egypt, Arab Rep.	Jordan	Jordan	Jordan	Jordan	Jordan	Jordan	Kuwait	Kuwait	Kuwait	Kuwait	Kuwait	Kuwait	Mauritania	Mauritania	Mauritania	Mauritania	Mauritania	Mauritania	Morocco	Morocco	Morocco	Morocco	Morocco	Morocco	Oman	Oman	Oman	Oman	Oman	Oman	Tunisia
Country Code	DZA	DZA	DZA	DZA	DZA	DZA	BHR	BHR	BHR	BHR	BHR	BHR	EGY	EGY	EGY	EGY	EGY	EGY	JOR	JOR	JOR	JOR	JOR	JOR	KWT	KWT	KWT	KWT	KWT	KWT	MRT	MRT	MRT	MRT	MRT	MRT	MAR	MAR	MAR	MAR	MAR	MAR	OMN	OMN	OMN	OMN	OMN	OMN	TUN
Series Name	Control of Corruption: Estimate	Government Effectiveness: Estimate	Political Stability and Absence of Violence/Terrorism: Estimate	Regulatory Quality: Estimate	Rule of Law: Estimate	Voice and Accountability: Estimate	Control of Corruption: Estimate	Government Effectiveness: Estimate	Political Stability and Absence of Violence/Terrorism: Estimate	Regulatory Quality: Estimate	Rule of Law: Estimate	Voice and Accountability: Estimate	Control of Corruption: Estimate	Government Effectiveness: Estimate	Political Stability and Absence of Violence/Terrorism: Estimate	Regulatory Quality: Estimate	Rule of Law: Estimate	Voice and Accountability: Estimate	Control of Corruption: Estimate	Government Effectiveness: Estimate	Political Stability and Absence of Violence/Terrorism: Estimate	Regulatory Quality: Estimate	Rule of Law: Estimate	Voice and Accountability: Estimate	Control of Corruption: Estimate	Government Effectiveness: Estimate	Political Stability and Absence of Violence/Terrorism: Estimate	Regulatory Quality: Estimate	Rule of Law: Estimate	Voice and Accountability: Estimate	Control of Corruption: Estimate	Government Effectiveness: Estimate	Political Stability and Absence of Violence/Terrorism: Estimate	Regulatory Quality: Estimate	Rule of Law: Estimate	Voice and Accountability: Estimate	Control of Corruption: Estimate	Government Effectiveness: Estimate	Political Stability and Absence of Violence/Terrorism: Estimate	Regulatory Quality: Estimate	Rule of Law: Estimate	Voice and Accountability: Estimate	Control of Corruption: Estimate	Government Effectiveness: Estimate	Political Stability and Absence of Violence/Terrorism: Estimate	Regulatory Quality: Estimate	Rule of Law: Estimate	Voice and Accountability: Estimate	Control of Corruption: Estimate
Series Code	CC.EST	GE.EST	PV.EST	RQ.EST	RL.EST	VA.EST	CC.EST	GE.EST	PV.EST	RQ.EST	RL.EST	VA.EST	CC.EST	GE.EST	PV.EST	RQ.EST	RL.EST	VA.EST	CC.EST	GE.EST	PV.EST	RQ.EST	RL.EST	VA.EST	CC.EST	GE.EST	PV.EST	RQ.EST	RL.EST	VA.EST	CC.EST	GE.EST	PV.EST	RQ.EST	RL.EST	VA.EST	CC.EST	GE.EST	PV.EST	RQ.EST	RL.EST	VA.EST	CC.EST	GE.EST	PV.EST	RQ.EST	RL.EST	VA.EST	CC.EST
1995	-0.566741	-0.566741	-0.566741	-0.566741	-0.566741	-0.566741	-0.566741	-0.566741	-0.566741	-0.566741	-0.566741	-0.566741	-0.566741	-0.566741	-0.566741	-0.566741	-0.566741	-0.566741	-0.566741	-0.566741	-0.566741	-0.566741	-0.566741	-0.566741	-0.566741	-0.566741	-0.566741	-0.566741	-0.566741	-0.566741	-0.566741	-0.566741	-0.566741	-0.566741	-0.566741	-0.566741	-0.566741	-0.566741	-0.566741	-0.566741	-0.566741	-0.566741	-0.566741	-0.566741	-0.566741	-0.566741	-0.566741	-0.566741	-0.566741
1996 [YR1996]	-0.566741	-1.08877	-1.78003	-0.907437	-1.21819	-1.16629	0.328689	0.77664	-0.307728	0.790487	-0.0101163	-0.718783	-0.472254	-0.473676	-0.523576	-0.04817	0.0012624	-0.844184	-0.0354075	-0.0329143	-0.0440035	0.0244693	0.276933	-0.238322	0.478682	0.115852	0.172681	0.314012	0.598829	-0.243808	-0.555694	-0.124193	0.367951	-0.401736	-0.503623	-0.56777	-0.106927	-0.104411	-0.207399	-0.102564	0.221231	-0.416847	0.414642	0.439419	0.874473	0.094098	0.55016	-0.713683	-0.533678
1997	-0.72426	-0.958884	-1.82795	-0.826126	-1.18938	-1.20532	0.300897	0.689843	-0.234613	0.798487	0.183681	-0.892093	-0.464297	-0.352184	-0.271052	-0.186854	-0.0196028	-0.877985	0.0313573	0.00742555	0.0159969	0.220982	0.315536	-0.329171	0.534717	0.025958	0.313917	0.138059	0.617837	-0.271445	-0.51194	-0.0897325	0.360162	-0.454171	-0.492654	-0.639585	0.0019605	-0.0539122	0.0505953	-0.0629004	0.226875	-0.330122	0.585353	0.444389	0.864814	0.0320081	0.500102	-0.800068	-0.385844
1998 [YR1998]	-0.88178	-0.829002	-1.87588	-0.744814	-1.16056	-1.24434	0.273106	0.603047	-0.161498	0.806488	0.377479	-1.0654	-0.456339	-0.230692	-0.0185278	-0.325537	-0.0404679	-0.911786	0.098122	0.0477654	0.0759973	0.417494	0.354139	-0.42002	0.590752	-0.0639357	0.455153	-0.0378954	0.636845	-0.299083	-0.468185	-0.0552722	0.352372	-0.506606	-0.481684	-0.7114	0.110848	-0.0034133	0.30859	-0.0232374	0.232518	-0.243398	0.756063	0.449359	0.855155	-0.0300817	0.450044	-0.886453	-0.238009
1999	-0.909845	-0.896421	-1.65394	-0.7251	-1.18595	-1.1772	0.327052	0.595995	-0.0528621	0.797916	0.337968	-1.06114	-0.504954	-0.224223	0.017291	-0.332489	-0.025626	-0.903146	0.0909608	0.0159914	0.0383404	0.336731	0.361625	-0.352444	0.590676	-0.0737242	0.603752	-0.0342081	0.604811	-0.298204	-0.460961	-0.0976242	0.34829	-0.440244	-0.452655	-0.750662	0.00055845	-0.0387592	0.121497	-0.0283833	0.180918	-0.346271	0.776794	0.383116	0.988837	0.0254617	0.504053	-0.821143	-0.234615
2000 [YR2000]	-0.937911	-0.963841	-1.43201	-0.705386	-1.21134	-1.11005	0.380999	0.588942	0.055774	0.789343	0.298458	-1.05688	-0.553568	-0.217753	0.0531098	-0.339442	-0.0107841	-0.894506	0.0837996	-0.0157826	0.0006835	0.255968	0.36911	-0.284869	0.590601	-0.0835127	0.752351	-0.0305208	0.572777	-0.297325	-0.453738	-0.139976	0.344208	-0.373882	-0.423626	-0.789924	-0.109731	-0.0741051	-0.0655948	-0.0335292	0.129317	-0.449144	0.797525	0.316872	1.12252	0.0810051	0.558062	-0.755833	-0.23122
2001	-0.906796	-0.78068	-1.53262	-0.644429	-0.920747	-1.07736	0.600789	0.570885	0.16996	0.848425	0.433074	-0.814022	-0.481458	-0.311883	-0.180164	-0.411219	0.0007806	-0.998398	0.0158267	0.0454004	-0.230199	0.150358	0.240632	-0.540716	0.802348	0.0119122	0.299337	0.166428	0.593406	-0.32957	-0.239517	-0.0682434	0.362583	-0.0176145	-0.473561	-0.791884	-0.148662	-0.110844	-0.164896	-0.0863603	0.0545017	-0.457486	0.866076	0.35434	1.02466	0.401683	0.514999	-0.771835	0.069361
2002 [YR2002]	-0.875681	-0.59752	-1.63323	-0.583472	-0.630159	-1.04466	0.820579	0.552828	0.284146	0.907506	0.56769	-0.571164	-0.409349	-0.406014	-0.413438	-0.482996	0.0123453	-1.10229	-0.0521463	0.106583	-0.461082	0.0447482	0.112153	-0.796564	1.01409	0.107337	-0.153678	0.363376	0.614034	-0.361815	-0.0252959	0.0034894	0.380958	0.338653	-0.523495	-0.793844	-0.187592	-0.147584	-0.264196	-0.139191	-0.0203135	-0.465829	0.934627	0.391808	0.926793	0.72236	0.471937	-0.787837	0.369942
2003 [YR2003]	-0.692261	-0.612373	-1.75363	-0.517234	-0.587644	-1.07672	0.399893	0.481797	0.483239	0.654211	0.620201	-0.590706	-0.552832	-0.336621	-0.640129	-0.598129	0.0213656	-1.08319	0.314559	0.212871	-0.0736035	0.205446	0.35686	-0.634042	0.799126	0.12475	0.293991	0.410733	0.574402	-0.396658	-0.0311151	0.046652	0.0597727	-0.0466674	-0.524478	-0.764577	-0.260044	-0.137936	-0.40534	-0.265645	-0.075726	-0.752867	0.590148	0.498728	1.06124	0.706246	0.491311	-0.822545	0.159738
2004 [YR2004]	-0.679478	-0.572631	-1.35952	-0.544126	-0.620909	-0.802059	0.451451	0.546102	0.312665	0.711522	0.709429	-0.561549	-0.647139	-0.265809	-0.821635	-0.508437	0.0195379	-0.947558	0.255592	0.0609842	-0.234769	0.293484	0.316052	-0.549855	0.786469	0.103922	0.344595	0.566696	0.519019	-0.303084	-0.526517	-0.432077	-0.165008	-0.057796	-0.72858	-1.13142	-0.143284	-0.12608	-0.312351	-0.24735	-0.0325502	-0.508275	0.67339	0.484034	1.11546	0.655456	0.522635	-0.656645	0.0828652
2005 [YR2005]	-0.482172	-0.467568	-0.915213	-0.383399	-0.750832	-0.715686	0.390058	0.396987	0.0116022	0.662023	0.606275	-0.743175	-0.624449	-0.415194	-0.63018	-0.424104	-0.0241827	-0.964781	0.256805	0.0282044	-0.133758	0.0972653	0.325274	-0.514288	0.507472	0.174501	0.250893	0.473385	0.53681	-0.483525	-0.56022	-0.292216	-0.230491	-0.372204	-0.711111	-0.912762	-0.307885	-0.279851	-0.555952	-0.410484	-0.164906	-0.687105	0.394656	0.326232	0.945717	0.550478	0.314848	-0.919638	-0.257894
2006 [YR2006]	-0.521335	-0.472641	-1.12645	-0.571554	-0.708591	-0.916875	0.19403	0.395685	-0.366437	0.683345	0.379538	-0.903967	-0.747485	-0.50644	-0.838823	-0.435703	-0.25781	-1.19927	0.259316	0.202514	-0.763257	0.330412	0.332674	-0.717005	0.433033	0.287202	0.41109	0.295331	0.538474	-0.581767	-0.742441	-0.87475	0.238642	-0.430267	-0.784649	-0.851903	-0.408489	-0.155644	-0.461175	-0.183422	-0.289713	-0.712467	0.352166	0.312265	0.840647	0.604931	0.294712	-1.15949	-0.189283
2007 [YR2007]	-0.559929	-0.565725	-1.14836	-0.622034	-0.772746	-0.984122	0.180774	0.408986	-0.247197	0.765329	0.53283	-0.856527	-0.762018	-0.389129	-0.551374	-0.28873	-0.229975	-1.16775	0.264059	0.226626	-0.299699	0.305014	0.38737	-0.676781	0.370586	0.0996809	0.620397	0.259469	0.604888	-0.545193	-0.578712	-0.906793	-0.278342	-0.458438	-0.703096	-0.666273	-0.344908	-0.170451	-0.500055	-0.216379	-0.298718	-0.707482	0.350805	0.335464	0.939024	0.613822	0.412377	-1.06266	-0.249607
2008 [YR2008]	-0.594569	-0.626527	-1.09399	-0.794614	-0.741469	-0.979712	0.18894	0.386813	-0.237403	0.711043	0.532877	-0.868918	-0.779132	-0.365895	-0.510508	-0.182439	-0.12925	-1.21224	0.356088	0.228669	-0.369226	0.316555	0.411545	-0.737369	0.420186	-0.0072513	0.50161	0.174522	0.58817	-0.543381	-0.787821	-0.977207	-0.642189	-0.644522	-1.14111	-0.942664	-0.382435	-0.175602	-0.570645	-0.188039	-0.303349	-0.758324	0.515381	0.419509	0.92223	0.695889	0.593788	-1.07074	-0.303903
2009 [YR2009]	-0.577883	-0.582937	-1.19708	-1.0738	-0.793536	-1.03843	0.185157	0.480627	-0.136449	0.69425	0.517286	-0.791001	-0.515469	-0.279506	-0.607051	-0.197176	-0.105177	-1.1575	0.158885	0.235816	-0.354287	0.273881	0.250783	-0.784595	0.309361	0.202237	0.352784	0.153575	0.586304	-0.484646	-0.613362	-0.894957	-0.883718	-0.684983	-0.804682	-0.924539	-0.325605	-0.140478	-0.397728	-0.0602428	-0.210024	-0.745736	0.332337	0.38391	0.826635	0.527706	0.555269	-1.07404	-0.220963
2010 [YR2010]	-0.52485	-0.479542	-1.25937	-1.17103	-0.784948	-1.02234	0.183213	0.456938	-0.493476	0.713898	0.435519	-0.96591	-0.631366	-0.370582	-0.898418	-0.17463	-0.17942	-1.18805	0.0411859	0.103684	-0.312493	0.226069	0.192973	-0.799326	0.302229	0.168634	0.451989	0.159951	0.591725	-0.524436	-0.715361	-0.970683	-1.07617	-0.827969	-0.889542	-0.909266	-0.204909	-0.104163	-0.383013	-0.0808093	-0.171846	-0.69859	0.323707	0.377855	0.590242	0.444548	0.542721	-1.0448	-0.258794
2011 [YR2011]	-0.544585	-0.564616	-1.36056	-1.18957	-0.807666	-1.00412	0.217318	0.520667	-0.950842	0.720997	0.352287	-1.21732	-0.695504	-0.568378	-1.43706	-0.343916	-0.452047	-1.13998	0.101029	0.0882191	-0.513562	0.29543	0.237919	-0.796205	0.0862528	0.0245808	0.311103	0.0832637	0.549244	-0.558574	-0.628131	-0.949555	-1.17368	-0.781344	-0.915251	-0.927596	-0.400819	-0.151642	-0.392257	-0.117086	-0.227677	-0.709957	0.139554	0.25122	0.432441	0.323657	0.467974	-1.06049	-0.0567588
2012 [YR2012]	-0.503218	-0.532319	-1.32504	-1.27687	-0.772281	-0.906027	0.373842	0.549759	-1.12996	0.689447	0.258339	-1.31803	-0.598088	-0.808497	-1.43633	-0.475141	-0.472384	-0.765064	0.072144	-0.0112745	-0.523978	0.193677	0.369098	-0.734493	-0.190458	-0.0703019	0.203606	-0.0365543	0.367613	-0.642978	-0.782562	-0.909613	-1.13399	-0.636884	-0.917475	-0.910916	-0.436757	-0.0591652	-0.470459	-0.0831831	-0.209178	-0.605667	0.182281	0.264541	0.462077	0.471573	0.523968	-1.02167	-0.0597201
2013 [YR2013]	-0.473484	-0.534195	-1.20237	-1.16597	-0.689374	-0.893353	0.433094	0.588787	-1.33542	0.607382	0.331084	-1.31746	-0.631305	-0.877399	-1.63883	-0.640084	-0.633282	-1.05156	0.0679131	-0.0489184	-0.606315	0.135905	0.392967	-0.806755	-0.188342	-0.0706692	0.166056	-0.0714554	0.365627	-0.657606	-0.833635	-0.998632	-1.01476	-0.654506	-0.998455	-0.95942	-0.371114	-0.0351245	-0.493018	-0.116067	-0.24795	-0.69858	0.159496	0.214115	0.45953	0.4758	0.492018	-1.03864	-0.0670398
2014 [YR2014]	-0.600029	-0.477553	-1.19053	-1.28296	-0.773168	-0.815198	0.27883	0.56504	-0.907475	0.708473	0.41372	-1.31106	-0.624815	-0.822677	-1.63118	-0.76256	-0.662516	-1.1806	0.13568	0.116841	-0.540026	0.076422	0.464213	-0.753646	-0.240323	-0.148399	0.149006	-0.145351	0.0224906	-0.65746	-0.92755	-0.991504	-0.589508	-0.806669	-0.860369	-0.895423	-0.265682	-0.0745343	-0.446266	-0.130392	-0.0651447	-0.686271	0.310048	0.265803	0.734907	0.692389	0.485808	-1.09071	-0.0368847
2015 [YR2015]	-0.645567	-0.500881	-1.09016	-1.17361	-0.863945	-0.849065	0.138849	0.559801	-1.07354	0.819667	0.425048	-1.31307	-0.638062	-0.769484	-1.49665	-0.835593	-0.601283	-1.19042	0.260073	0.122487	-0.605779	0.0833356	0.439426	-0.769385	-0.225097	-0.0332199	-0.21342	-0.173127	0.001072	-0.663664	-0.923314	-1.02689	-0.637801	-0.869483	-0.866077	-0.887887	-0.220341	-0.06205	-0.341487	-0.170745	-0.0889452	-0.628307	0.268914	0.0814258	0.78334	0.57451	0.376886	-1.06145	-0.0688108
2016 [YR2016]	-0.677893	-0.53116	-1.09753	-1.17188	-0.857401	-0.862889	-0.0158624	0.327843	-0.793426	0.608239	0.456381	-1.37208	-0.644725	-0.659546	-1.4377	-0.92319	-0.517301	-1.2045	0.265293	0.13379	-0.492398	0.0516795	0.3043	-0.711113	-0.268207	-0.163533	-0.0496832	-0.073882	0.0279303	-0.62891	-0.739235	-0.771947	-0.746968	-0.743002	-0.726432	-0.772699	-0.129715	-0.106201	-0.312574	-0.234951	-0.158313	-0.620477	0.339484	0.191946	0.760053	0.610466	0.407917	-1.05436	-0.134845
2017 [YR2017]	-0.601742	-0.589159	-0.915669	-1.1963	-0.863938	-0.903749	-0.140962	0.193921	-0.961425	0.414516	0.446703	-1.38665	-0.53666	-0.619675	-1.4243	-0.862057	-0.542538	-1.25069	0.25977	0.109076	-0.497875	0.0962652	0.261328	-0.721102	-0.331509	-0.176568	-0.045894	-0.0620899	0.101462	-0.606944	-0.751324	-0.728227	-0.626859	-0.775995	-0.59929	-0.799728	-0.140288	-0.193549	-0.373956	-0.228113	-0.162154	-0.667624	0.24762	0.192915	0.754208	0.420804	0.432476	-1.06124	-0.108679
2018 [YR2018]	-0.630162	-0.443925	-0.826592	-1.26254	-0.775235	-0.981677	-0.147291	0.179877	-0.840905	0.416923	0.412273	-1.40562	-0.565869	-0.584804	-1.17003	-0.863224	-0.412393	-1.31154	0.149578	0.112718	-0.412433	0.0298972	0.233432	-0.700138	-0.289452	-0.0878059	0.1098	0.0256516	0.2104	-0.58896	-0.807347	-0.726633	-0.619991	-0.810981	-0.68591	-0.853396	-0.217327	-0.209296	-0.336377	-0.285525	-0.138685	-0.659232	0.246132	0.186578	0.65515	0.173304	0.464404	-1.02585	-0.0536738
2019 [YR2019]	-0.62185	-0.516175	-1.00358	-1.30338	-0.815464	-1.03768	-0.010218	0.298761	-0.661518	0.485098	0.494378	-1.41258	-0.670213	-0.423538	-1.06642	-0.827766	-0.420846	-1.42867	0.127979	0.0994703	-0.357862	0.0346094	0.143957	-0.665045	-0.132789	0.0184673	0.200381	0.0649239	0.215674	-0.63479	-0.861584	-0.498213	-0.542217	-0.75934	-0.582718	-0.780214	-0.276536	-0.119225	-0.369398	-0.211528	-0.135649	-0.626805	0.452129	0.259309	0.593485	0.292457	0.554404	-1.13628	-0.0770505
[truncated: 11 more columns]

## Sheet: Feuil2
Country Name	Algeria	Algeria	Algeria	Algeria	Algeria	Algeria	Bahrain	Bahrain	Bahrain	Bahrain	Bahrain	Bahrain	Egypt. Arab Rep.	Egypt. Arab Rep.	Egypt. Arab Rep.	Egypt. Arab Rep.	Egypt. Arab Rep.	Egypt. Arab Rep.	Jordan	Jordan	Jordan	Jordan	Jordan	Jordan	Kuwait	Kuwait	Kuwait	Kuwait	Kuwait	Kuwait	Mauritania	Mauritania	Mauritania	Mauritania	Mauritania	Mauritania	Morocco	Morocco	Morocco	Morocco	Morocco	Morocco	Oman	Oman	Oman	Oman	Oman	Oman	Tunisia
Country Code	DZA	DZA	DZA	DZA	DZA	DZA	BHR	BHR	BHR	BHR	BHR	BHR	EGY	EGY	EGY	EGY	EGY	EGY	JOR	JOR	JOR	JOR	JOR	JOR	KWT	KWT	KWT	KWT	KWT	KWT	MRT	MRT	MRT	MRT	MRT	MRT	MAR	MAR	MAR	MAR	MAR	MAR	OMN	OMN	OMN	OMN	OMN	OMN	TUN
Series Name	Control of Corruption: Estimate	Government Effectiveness: Estimate	Political Stability and Absence of Violence/Terrorism: Estimate	Regulatory Quality: Estimate	Rule of Law: Estimate	Voice and Accountability: Estimate	Control of Corruption: Estimate	Government Effectiveness: Estimate	Political Stability and Absence of Violence/Terrorism: Estimate	Regulatory Quality: Estimate	Rule of Law: Estimate	Voice and Accountability: Estimate	Control of Corruption: Estimate	Government Effectiveness: Estimate	Political Stability and Absence of Violence/Terrorism: Estimate	Regulatory Quality: Estimate	Rule of Law: Estimate	Voice and Accountability: Estimate	Control of Corruption: Estimate	Government Effectiveness: Estimate	Political Stability and Absence of Violence/Terrorism: Estimate	Regulatory Quality: Estimate	Rule of Law: Estimate	Voice and Accountability: Estimate	Control of Corruption: Estimate	Government Effectiveness: Estimate	Political Stability and Absence of Violence/Terrorism: Estimate	Regulatory Quality: Estimate	Rule of Law: Estimate	Voice and Accountability: Estimate	Control of Corruption: Estimate	Government Effectiveness: Estimate	Political Stability and Absence of Violence/Terrorism: Estimate	Regulatory Quality: Estimate	Rule of Law: Estimate	Voice and Accountability: Estimate	Control of Corruption: Estimate	Government Effectiveness: Estimate	Political Stability and Absence of Violence/Terrorism: Estimate	Regulatory Quality: Estimate	Rule of Law: Estimate	Voice and Accountability: Estimate	Control of Corruption: Estimate	Government Effectiveness: Estimate	Political Stability and Absence of Violence/Terrorism: Estimate	Regulatory Quality: Estimate	Rule of Law: Estimate	Voice and Accountability: Estimate	Control of Corruption: Estimate
Series Code	CC.EST	GE.EST	PV.EST	RQ.EST	RL.EST	VA.EST	CC.EST	GE.EST	PV.EST	RQ.EST	RL.EST	VA.EST	CC.EST	GE.EST	PV.EST	RQ.EST	RL.EST	VA.EST	CC.EST	GE.EST	PV.EST	RQ.EST	RL.EST	VA.EST	CC.EST	GE.EST	PV.EST	RQ.EST	RL.EST	VA.EST	CC.EST	GE.EST	PV.EST	RQ.EST	RL.EST	VA.EST	CC.EST	GE.EST	PV.EST	RQ.EST	RL.EST	VA.EST	CC.EST	GE.EST	PV.EST	RQ.EST	RL.EST	VA.EST	CC.EST
1995	-0.5667409	-0.5667409	-0.5667409	-0.5667409	-0.5667409	-0.5667409	-0.5667409	-0.5667409	-0.5667409	-0.5667409	-0.5667409	-0.5667409	-0.5667409	-0.5667409	-0.5667409	-0.5667409	-0.5667409	-0.5667409	-0.5667409	-0.5667409	-0.5667409	-0.5667409	-0.5667409	-0.5667409	-0.5667409	-0.5667409	-0.5667409	-0.5667409	-0.5667409	-0.5667409	-0.5667409	-0.5667409	-0.5667409	-0.5667409	-0.5667409	-0.5667409	-0.5667409	-0.5667409	-0.5667409	-0.5667409	-0.5667409	-0.5667409	-0.5667409	-0.5667409	-0.5667409	-0.5667409	-0.5667409	-0.5667409	-0.5667409
1996 [YR1996]	-0.5667409	-1.088766	-1.780031	-0.9074373	-1.218195	-1.16629	0.3286887	0.7766396	-0.3077276	0.7904871	-0.0101163	-0.7187834	-0.4722544	-0.4736761	-0.5235761	-0.04817	0.0012624	-0.8441842	-0.0354075	-0.0329143	-0.0440035	0.0244693	0.2769329	-0.2383221	0.4786822	0.1158516	0.1726813	0.3140124	0.598829	-0.243808	-0.5556942	-0.1241927	0.3679513	-0.4017357	-0.5036233	-0.5677702	-0.106927	-0.1044111	-0.2073991	-0.1025635	0.2212313	-0.4168465	0.4146422	0.4394189	0.8744729	0.094098	0.5501598	-0.7136831	-0.5336781
1997	-0.7242602	-0.95888385	-1.8279535	-0.82612575	-1.1893785	-1.205316	0.30089715	0.6898433	-0.23461285	0.7984874	0.1836812	-0.8920932	-0.46429675	-0.35218415	-0.27105195	-0.18685355	-0.01960275	-0.87798515	0.03135725	0.00742555	0.0159969	0.22098155	0.31553615	-0.3291709	0.53471715	0.02595795	0.31391695	0.1380585	0.6178369	-0.27144545	-0.51193955	-0.08973245	0.3601618	-0.454171	-0.4926537	-0.63958505	0.0019605	-0.0539122	0.0505953	-0.06290045	0.2268749	-0.33012215	0.5853527	0.444389	0.86481405	0.03200815	0.5001019	-0.8000681	-0.3858436
1998 [YR1998]	-0.8817795	-0.8290017	-1.875876	-0.7448142	-1.160562	-1.244342	0.2731056	0.603047	-0.1614981	0.8064877	0.3774787	-1.065403	-0.4563391	-0.2306922	-0.0185278	-0.3255371	-0.0404679	-0.9117861	0.098122	0.0477654	0.0759973	0.4174938	0.3541394	-0.4200197	0.5907521	-0.0639357	0.4551526	-0.0378954	0.6368448	-0.2990829	-0.4681849	-0.0552722	0.3523723	-0.5066063	-0.4816841	-0.7113999	0.110848	-0.0034133	0.3085897	-0.0232374	0.2325185	-0.2433978	0.7560632	0.4493591	0.8551552	-0.0300817	0.450044	-0.8864531	-0.2380091
1999	-0.9098453	-0.89642135	-1.653943	-0.7251	-1.185949	-1.177197	0.32705235	0.5959947	-0.05286205	0.79791555	0.3379684	-1.0611415	-0.50495355	-0.2242226	0.017291	-0.3324894	-0.025626	-0.90314615	0.0909608	0.0159914	0.0383404	0.33673085	0.36162455	-0.35244435	0.59067635	-0.0737242	0.60375195	-0.0342081	0.60481085	-0.2982039	-0.4609612	-0.0976242	0.34829	-0.4402441	-0.45265515	-0.75066195	0.000558450000000002	-0.0387592	0.12149745	-0.0283833	0.1809177	-0.34627085	0.77679405	0.38311575	0.9888366	0.0254617	0.50405305	-0.8211432	-0.23461475
2000 [YR2000]	-0.9379111	-0.963841	-1.43201	-0.7053858	-1.211336	-1.110052	0.3809991	0.5889424	0.055774	0.7893434	0.2984581	-1.05688	-0.553568	-0.217753	0.0531098	-0.3394417	-0.0107841	-0.8945062	0.0837996	-0.0157826	0.0006835	0.2559679	0.3691097	-0.284869	0.5906006	-0.0835127	0.7523513	-0.0305208	0.5727769	-0.2973249	-0.4537375	-0.1399762	0.3442077	-0.3738819	-0.4236262	-0.789924	-0.1097311	-0.0741051	-0.0655948	-0.0335292	0.1293169	-0.4491439	0.7975249	0.3168724	1.122518	0.0810051	0.5580621	-0.7558333	-0.2312204
2001	-0.9067961	-0.7806804	-1.532622	-0.64442875	-0.9207473	-1.077356	0.60078885	0.57088515	0.16996005	0.8484246	0.4330742	-0.81402185	-0.48145845	-0.3118833	-0.18016425	-0.41121875	0.0007806	-0.9983981	0.01582665	0.0454004	-0.23019915	0.15035805	0.24063155	-0.5407163	0.8023478	0.0119122	0.29933685	0.1664278	0.5934055	-0.32956985	-0.2395167	-0.0682434	0.362583	-0.01761445	-0.47356055	-0.7918838	-0.1486615	-0.1108443	-0.16489555	-0.0863603	0.0545017	-0.45748625	0.86607615	0.35434025	1.0246553	0.4016826	0.5149994	-0.7718352	0.069361
2002 [YR2002]	-0.8756811	-0.5975198	-1.633234	-0.5834717	-0.6301586	-1.04466	0.8205786	0.5528279	0.2841461	0.9075058	0.5676903	-0.5711637	-0.4093489	-0.4060136	-0.4134383	-0.4829958	0.0123453	-1.10229	-0.0521463	0.1065834	-0.4610818	0.0447482	0.1121534	-0.7965636	1.014095	0.1073371	-0.1536776	0.3633764	0.6140341	-0.3618148	-0.0252959	0.0034894	0.3809583	0.338653	-0.5234949	-0.7938436	-0.1875919	-0.1475835	-0.2641963	-0.1391914	-0.0203135	-0.4658286	0.9346274	0.3918081	0.9267926	0.7223601	0.4719367	-0.7878371	0.3699424
2003 [YR2003]	-0.6922612	-0.6123729	-1.753627	-0.5172341	-0.587644	-1.076718	0.3998932	0.4817965	0.483239	0.6542107	0.6202008	-0.5907056	-0.552832	-0.3366209	-0.640129	-0.5981286	0.0213656	-1.083185	0.3145591	0.2128709	-0.0736035	0.205446	0.3568603	-0.6340421	0.7991259	0.1247503	0.2939909	0.4107331	0.5744021	-0.3966581	-0.0311151	0.046652	0.0597727	-0.0466674	-0.5244782	-0.7645772	-0.2600439	-0.1379356	-0.4053404	-0.2656455	-0.075726	-0.7528671	0.5901475	0.4987276	1.061241	0.7062459	0.491311	-0.8225452	0.1597376
2004 [YR2004]	-0.679478	-0.5726308	-1.359521	-0.5441265	-0.6209092	-0.8020591	0.4514511	0.546102	0.3126653	0.7115225	0.7094293	-0.5615494	-0.6471386	-0.2658089	-0.821635	-0.5084369	0.0195379	-0.9475579	0.2555923	0.0609842	-0.2347692	0.2934837	0.3160516	-0.5498545	0.7864687	0.1039224	0.3445948	0.5666956	0.5190188	-0.3030844	-0.526517	-0.4320766	-0.1650079	-0.057796	-0.7285797	-1.131421	-0.1432836	-0.1260798	-0.312351	-0.2473502	-0.0325502	-0.5082746	0.6733904	0.484034	1.115456	0.6554562	0.5226349	-0.6566447	0.0828652
2005 [YR2005]	-0.482172	-0.4675675	-0.9152133	-0.3833986	-0.7508321	-0.715686	0.3900585	0.3969875	0.0116022	0.6620233	0.6062749	-0.7431749	-0.6244493	-0.4151942	-0.6301804	-0.4241044	-0.0241827	-0.9647809	0.2568047	0.0282044	-0.1337577	0.0972653	0.3252741	-0.5142884	0.5074719	0.1745008	0.2508935	0.4733854	0.53681	-0.4835252	-0.5602201	-0.2922155	-0.230491	-0.372204	-0.7111109	-0.9127617	-0.3078854	-0.2798505	-0.5559525	-0.4104842	-0.1649063	-0.6871049	0.3946556	0.3262324	0.9457167	0.5504777	0.3148483	-0.9196379	-0.2578937
2006 [YR2006]	-0.5213351	-0.4726413	-1.126453	-0.5715542	-0.7085913	-0.9168755	0.1940299	0.3956852	-0.3664373	0.6833447	0.3795384	-0.9039665	-0.7474851	-0.5064402	-0.8388225	-0.4357026	-0.2578102	-1.199265	0.2593156	0.2025136	-0.7632574	0.3304124	0.3326735	-0.7170047	0.4330326	0.2872019	0.4110898	0.2953306	0.5384738	-0.5817673	-0.7424415	-0.8747498	0.2386422	-0.4302672	-0.7846489	-0.8519025	-0.4084886	-0.155644	-0.4611753	-0.183422	-0.2897126	-0.7124671	0.3521665	0.3122646	0.8406475	0.6049306	0.2947118	-1.159487	-0.189283
2007 [YR2007]	-0.5599289	-0.5657254	-1.14836	-0.622034	-0.7727457	-0.9841224	0.1807736	0.4089861	-0.2471969	0.7653286	0.5328299	-0.8565266	-0.7620175	-0.3891287	-0.5513738	-0.2887296	-0.2299755	-1.167745	0.2640594	0.2266261	-0.2996989	0.305014	0.3873699	-0.6767808	0.3705859	0.0996809	0.6203967	0.2594693	0.604888	-0.5451928	-0.5787115	-0.9067926	-0.2783419	-0.4584383	-0.703096	-0.6662735	-0.3449084	-0.1704507	-0.5000547	-0.2163792	-0.2987185	-0.7074819	0.3508053	0.3354644	0.9390239	0.613822	0.4123771	-1.062661	-0.249607
2008 [YR2008]	-0.5945694	-0.6265267	-1.093989	-0.7946138	-0.7414688	-0.9797122	0.18894	0.3868127	-0.2374032	0.7110434	0.5328768	-0.8689175	-0.7791319	-0.3658952	-0.5105076	-0.1824392	-0.1292502	-1.212239	0.356088	0.2286688	-0.3692256	0.3165545	0.4115452	-0.7373688	0.4201856	-0.0072513	0.5016096	0.1745221	0.5881702	-0.5433814	-0.7878206	-0.9772067	-0.6421886	-0.644522	-1.141112	-0.942664	-0.3824355	-0.1756016	-0.5706448	-0.1880394	-0.3033495	-0.758324	0.5153807	0.4195092	0.9222303	0.6958894	0.5937881	-1.070743	-0.3039028
2009 [YR2009]	-0.5778834	-0.5829369	-1.197078	-1.073803	-0.7935362	-1.038431	0.1851566	0.4806274	-0.1364494	0.6942499	0.5172865	-0.7910007	-0.5154691	-0.2795061	-0.607051	-0.1971762	-0.1051766	-1.157501	0.1588846	0.2358158	-0.3542873	0.2738815	0.2507831	-0.7845951	0.3093611	0.2022372	0.3527843	0.1535748	0.5863044	-0.4846455	-0.6133621	-0.8949571	-0.8837178	-0.6849827	-0.8046821	-0.9245395	-0.3256046	-0.1404784	-0.3977285	-0.0602428	-0.2100238	-0.7457357	0.3323366	0.3839098	0.8266353	0.5277063	0.5552685	-1.074038	-0.2209633
2010 [YR2010]	-0.5248498	-0.4795416	-1.259368	-1.171034	-0.7849475	-1.022338	0.183213	0.456938	-0.4934764	0.7138977	0.4355193	-0.9659101	-0.6313661	-0.3705819	-0.8984183	-0.1746296	-0.1794199	-1.188054	0.0411859	0.1036845	-0.3124925	0.2260692	0.1929732	-0.7993262	0.3022288	0.1686341	0.4519888	0.1599515	0.5917252	-0.5244356	-0.7153614	-0.9706828	-1.07617	-0.8279694	-0.8895416	-0.9092659	-0.2049095	-0.1041628	-0.3830133	-0.0808093	-0.1718455	-0.6985896	0.3237071	0.3778546	0.5902417	0.4445483	0.5427212	-1.044803	-0.2587942
2011 [YR2011]	-0.5445848	-0.5646155	-1.360561	-1.189574	-0.8076658	-1.004121	0.2173178	0.5206671	-0.9508419	0.7209967	0.352287	-1.217317	-0.6955042	-0.5683784	-1.437057	-0.3439164	-0.452047	-1.139983	0.1010287	0.0882191	-0.5135623	0.2954305	0.2379189	-0.7962052	0.0862528	0.0245808	0.3111027	0.0832637	0.5492437	-0.5585736	-0.6281309	-0.9495553	-1.173679	-0.7813443	-0.915251	-0.9275963	-0.4008193	-0.151642	-0.3922568	-0.1170862	-0.2276767	-0.7099568	0.139554	0.2512203	0.4324405	0.3236573	0.4679742	-1.060491	-0.0567588
2012 [YR2012]	-0.5032176	-0.5323191	-1.325043	-1.276868	-0.7722811	-0.9060266	0.3738421	0.5497593	-1.129955	0.6894466	0.258339	-1.318025	-0.5980877	-0.8084975	-1.43633	-0.4751413	-0.4723835	-0.7650635	0.072144	-0.0112745	-0.5239776	0.1936769	0.3690984	-0.7344927	-0.1904581	-0.0703019	0.2036062	-0.0365543	0.3676134	-0.642978	-0.7825618	-0.9096129	-1.133992	-0.6368836	-0.917475	-0.9109163	-0.4367572	-0.0591652	-0.4704588	-0.0831831	-0.2091782	-0.6056672	0.1822813	0.2645408	0.4620771	0.4715728	0.5239685	-1.02167	-0.0597201
2013 [YR2013]	-0.4734841	-0.5341949	-1.202371	-1.16597	-0.6893736	-0.8933532	0.4330941	0.588787	-1.335418	0.6073823	0.3310837	-1.317464	-0.6313052	-0.8773995	-1.638831	-0.6400837	-0.633282	-1.051559	0.0679131	-0.0489184	-0.6063153	0.1359051	0.3929674	-0.8067545	-0.1883423	-0.0706692	0.1660556	-0.0714554	0.3656267	-0.6576061	-0.8336353	-0.9986318	-1.014761	-0.654506	-0.9984549	-0.9594198	-0.3711136	-0.0351245	-0.4930176	-0.116067	-0.2479497	-0.6985801	0.159496	0.2141149	0.4595302	0.4758003	0.4920177	-1.038642	-0.0670398
2014 [YR2014]	-0.600029	-0.4775529	-1.190535	-1.282962	-0.7731679	-0.8151981	0.2788305	0.5650396	-0.9074749	0.7084731	0.4137195	-1.311063	-0.6248149	-0.8226774	-1.631177	-0.7625603	-0.6625163	-1.1806	0.1356801	0.116841	-0.5400255	0.076422	0.4642132	-0.7536456	-0.2403229	-0.148399	0.1490065	-0.1453513	0.0224906	-0.6574598	-0.9275495	-0.991504	-0.5895084	-0.8066694	-0.8603694	-0.8954228	-0.2656817	-0.0745343	-0.4462656	-0.1303917	-0.0651447	-0.6862711	0.3100477	0.2658027	0.7349073	0.6923888	0.4858075	-1.090711	-0.0368847
2015 [YR2015]	-0.6455669	-0.5008814	-1.09016	-1.173605	-0.8639446	-0.8490652	0.1388495	0.5598009	-1.07354	0.8196669	0.4250485	-1.313066	-0.638062	-0.7694843	-1.496646	-0.8355927	-0.6012825	-1.190417	0.2600729	0.122487	-0.6057786	0.0833356	0.4394264	-0.769385	-0.2250967	-0.0332199	-0.2134203	-0.173127	0.001072	-0.6636639	-0.9233136	-1.026887	-0.6378012	-0.8694826	-0.8660766	-0.8878872	-0.2203408	-0.06205	-0.3414874	-0.1707448	-0.0889452	-0.6283069	0.2689142	0.0814258	0.7833398	0.5745103	0.3768862	-1.061453	-0.0688108
2016 [YR2016]	-0.6778925	-0.5311597	-1.097526	-1.171879	-0.857401	-0.8628893	-0.0158624	0.3278428	-0.7934257	0.6082391	0.4563805	-1.372085	-0.6447245	-0.6595458	-1.437697	-0.9231897	-0.5173006	-1.204502	0.2652933	0.1337902	-0.4923984	0.0516795	0.3043001	-0.7111135	-0.2682074	-0.1635327	-0.0496832	-0.073882	0.0279303	-0.6289104	-0.7392347	-0.7719472	-0.7469677	-0.7430018	-0.7264318	-0.7726986	-0.129715	-0.1062014	-0.3125735	-0.2349505	-0.1583126	-0.6204771	0.3394838	0.1919464	0.760053	0.6104661	0.4079171	-1.054357	-0.1348448
2017 [YR2017]	-0.6017423	-0.5891593	-0.9156688	-1.196304	-0.8639383	-0.9037489	-0.1409623	0.1939208	-0.9614251	0.4145159	0.4467034	-1.386648	-0.5366598	-0.6196748	-1.424304	-0.8620573	-0.5425377	-1.250686	0.2597699	0.1090764	-0.4978754	0.0962652	0.261328	-0.7211017	-0.3315088	-0.1765683	-0.045894	-0.0620899	0.1014623	-0.606944	-0.7513238	-0.728227	-0.6268587	-0.7759946	-0.5992904	-0.7997279	-0.1402876	-0.1935492	-0.3739561	-0.2281133	-0.1621543	-0.6676235	0.2476197	0.1929151	0.7542076	0.4208038	0.4324757	-1.061237	-0.1086788
2018 [YR2018]	-0.6301624	-0.4439246	-0.8265918	-1.26254	-0.7752355	-0.9816775	-0.147291	0.1798774	-0.8409045	0.4169226	0.4122726	-1.405623	-0.5658687	-0.5848041	-1.170035	-0.8632245	-0.4123932	-1.311536	0.1495778	0.112718	-0.412433	0.0298972	0.2334316	-0.7001383	-0.2894517	-0.0878059	0.1098001	0.0256516	0.2104	-0.5889603	-0.807347	-0.7266325	-0.6199906	-0.810981	-0.6859097	-0.8533964	-0.2173273	-0.2092959	-0.3363768	-0.2855255	-0.1386846	-0.6592323	0.2461315	0.1865782	0.6551499	0.1733039	0.464404	-1.025849	-0.0536738
2019 [YR2019]	-0.6218498	-0.5161746	-1.003575	-1.303379	-0.8154638	-1.037679	-0.010218	0.298761	-0.661518	0.4850985	0.4943778	-1.412584	-0.670213	-0.4235377	-1.066421	-0.827766	-0.420846	-1.428673	0.1279795	0.0994703	-0.3578623	0.0346094	0.1439575	-0.6650451	-0.132789	0.0184673	0.2003809	0.0649239	0.215674	-0.6347895	-0.8615845	-0.4982125	-0.5422166	-0.7593397	-0.5827179	-0.7802137	-0.2765363	-0.1192252	-0.3693984	-0.2115284	-0.1356491	-0.6268054	0.4521289	0.2593093	0.5934848	0.2924571	0.5544039	-1.136281	-0.0770505
[truncated: 11 more columns]

## Sheet: Feuil3
-0.473	0.821	-0.409	0.356	1.014	-0.0253	0.111	0.935	0.364	0.37
-0.938	-0.567	-0.779	-0.567	-0.567	-0.927	-0.567	-0.567	-0.567	-0.567
-0.444	0.777	-0.218	0.236	0.287	0.047	-0.003	0.499	0.323	0.643
-1.089	-0.567	-0.877	-0.567	-0.567	-1.027	-0.567	-0.567	-0.567	-0.567
-0.567	0.483	0.0531	0.076	0.752	0.381	0.30859	1.123	0.227	0.325
-1.876	-1.335	-1.639	-0.763	-0.567	-1.174	-0.570645	-0.567	-0.655	-1.141
-0.383	0.907	-0.0481	0.417	0.567	0.339	-0.023237	0.722	0.161	0.142
-1.303	-0.567	-0.923	-0.567	-0.567	-0.869	-0.567	-0.567	-0.567	-0.567
-0.567	0.709	0.021	0.464	0.637	-0.424	0.232519	0.594	0.338	0.13
-1.218	-0.567	-0.662	-0.567	-0.567	-1.141	-0.567	-0.567	-0.567	-0.567
-0.567	-0.562	-0.567	-0.238	-0.244	-0.567	-0.244	-0.567	-0.567	0.305
-1.244	-1.413	-1.43	-0.807	-0.664	-1.131	-0.758	-1.159	-1.907	-1.416

## Sheet: Series - Metadata
Code	Indicator Name	Long definition	Source	Periodicity
CC.EST	Control of Corruption: Estimate	Control of Corruption captures perceptions of the extent to which public power is exercised for private gain, including both petty and grand forms of corruption, as well as "capture" of the state by elites and private interests. Estimate gives the country's score on the aggregate indicator, in units of a standard normal distribution, i.e. ranging from approximately -2.5 to 2.5.	Detailed documentation of the WGI, interactive tools for exploring the data, and full access to the underlying source data available at www.govindicators.org.The WGI are produced by Daniel Kaufmann (Natural Resource Governance Institute and Brookings Institution) and Aart Kraay (World Bank Development Research Group). Please cite Kaufmann, Daniel, Aart Kraay and Massimo Mastruzzi (2010). "The Wor…	Annual
CC.NO.SRC	Control of Corruption: Number of Sources	Control of Corruption captures perceptions of the extent to which public power is exercised for private gain, including both petty and grand forms of corruption, as well as "capture" of the state by elites and private interests. Number of sources indicates the number of underlying data sources on which the aggregate estimate is based.	Detailed documentation of the WGI, interactive tools for exploring the data, and full access to the underlying source data available at www.govindicators.org.The WGI are produced by Daniel Kaufmann (Natural Resource Governance Institute and Brookings Institution) and Aart Kraay (World Bank Development Research Group). Please cite Kaufmann, Daniel, Aart Kraay and Massimo Mastruzzi (2010). "The Wor…	Annual
CC.PER.RNK	Control of Corruption: Percentile Rank	Control of Corruption captures perceptions of the extent to which public power is exercised for private gain, including both petty and grand forms of corruption, as well as "capture" of the state by elites and private interests. Percentile rank indicates the country's rank among all countries covered by the aggregate indicator, with 0 corresponding to lowest rank, and 100 to highest rank. Percent…	Detailed documentation of the WGI, interactive tools for exploring the data, and full access to the underlying source data available at www.govindicators.org.The WGI are produced by Daniel Kaufmann (Natural Resource Governance Institute and Brookings Institution) and Aart Kraay (World Bank Development Research Group). Please cite Kaufmann, Daniel, Aart Kraay and Massimo Mastruzzi (2010). "The Wor…	Annual
CC.PER.RNK.LOWER	Control of Corruption: Percentile Rank, Lower Bound of 90% Confidence Interval	Control of Corruption captures perceptions of the extent to which public power is exercised for private gain, including both petty and grand forms of corruption, as well as "capture" of the state by elites and private interests. Percentile rank indicates the country's rank among all countries covered by the aggregate indicator, with 0 corresponding to lowest rank, and 100 to highest rank. Percent…	Detailed documentation of the WGI, interactive tools for exploring the data, and full access to the underlying source data available at www.govindicators.org.The WGI are produced by Daniel Kaufmann (Natural Resource Governance Institute and Brookings Institution) and Aart Kraay (World Bank Development Research Group). Please cite Kaufmann, Daniel, Aart Kraay and Massimo Mastruzzi (2010). "The Wor…	Annual
CC.PER.RNK.UPPER	Control of Corruption: Percentile Rank, Upper Bound of 90% Confidence Interval	Control of Corruption captures perceptions of the extent to which public power is exercised for private gain, including both petty and grand forms of corruption, as well as "capture" of the state by elites and private interests. Percentile rank indicates the country's rank among all countries covered by the aggregate indicator, with 0 corresponding to lowest rank, and 100 to highest rank. Percent…	Detailed documentation of the WGI, interactive tools for exploring the data, and full access to the underlying source data available at www.govindicators.org.The WGI are produced by Daniel Kaufmann (Natural Resource Governance Institute and Brookings Institution) and Aart Kraay (World Bank Development Research Group). Please cite Kaufmann, Daniel, Aart Kraay and Massimo Mastruzzi (2010). "The Wor…	Annual
CC.STD.ERR	Control of Corruption: Standard Error	Control of Corruption captures perceptions of the extent to which public power is exercised for private gain, including both petty and grand forms of corruption, as well as "capture" of the state by elites and private interests. Standard error indicates the precision of the estimate of governance. Larger values of the standard error indicate less precise estimates. A 90 percent confidence interva…	Detailed documentation of the WGI, interactive tools for exploring the data, and full access to the underlying source data available at www.govindicators.org.The WGI are produced by Daniel Kaufmann (Natural Resource Governance Institute and Brookings Institution) and Aart Kraay (World Bank Development Research Group). Please cite Kaufmann, Daniel, Aart Kraay and Massimo Mastruzzi (2010). "The Wor…	Annual
GE.EST	Government Effectiveness: Estimate	Government Effectiveness captures perceptions of the quality of public services, the quality of the civil service and the degree of its independence from political pressures, the quality of policy formulation and implementation, and the credibility of the government's commitment to such policies. Estimate gives the country's score on the aggregate indicator, in units of a standard normal distribu…	Detailed documentation of the WGI, interactive tools for exploring the data, and full access to the underlying source data available at www.govindicators.org.The WGI are produced by Daniel Kaufmann (Natural Resource Governance Institute and Brookings Institution) and Aart Kraay (World Bank Development Research Group). Please cite Kaufmann, Daniel, Aart Kraay and Massimo Mastruzzi (2010). "The Wor…	Annual
GE.NO.SRC	Government Effectiveness: Number of Sources	Government Effectiveness captures perceptions of the quality of public services, the quality of the civil service and the degree of its independence from political pressures, the quality of policy formulation and implementation, and the credibility of the government's commitment to such policies. Number of sources indicates the number of underlying data sources on which the aggregate estimate is …	Detailed documentation of the WGI, interactive tools for exploring the data, and full access to the underlying source data available at www.govindicators.org.The WGI are produced by Daniel Kaufmann (Natural Resource Governance Institute and Brookings Institution) and Aart Kraay (World Bank Development Research Group). Please cite Kaufmann, Daniel, Aart Kraay and Massimo Mastruzzi (2010). "The Wor…	Annual
GE.PER.RNK	Government Effectiveness: Percentile Rank	Government Effectiveness captures perceptions of the quality of public services, the quality of the civil service and the degree of its independence from political pressures, the quality of policy formulation and implementation, and the credibility of the government's commitment to such policies. Percentile rank indicates the country's rank among all countries covered by the aggregate indicator, …	Detailed documentation of the WGI, interactive tools for exploring the data, and full access to the underlying source data available at www.govindicators.org.The WGI are produced by Daniel Kaufmann (Natural Resource Governance Institute and Brookings Institution) and Aart Kraay (World Bank Development Research Group). Please cite Kaufmann, Daniel, Aart Kraay and Massimo Mastruzzi (2010). "The Wor…	Annual
GE.PER.RNK.LOWER	Government Effectiveness: Percentile Rank, Lower Bound of 90% Confidence Interval	Government Effectiveness captures perceptions of the quality of public services, the quality of the civil service and the degree of its independence from political pressures, the quality of policy formulation and implementation, and the credibility of the government's commitment to such policies. Percentile rank indicates the country's rank among all countries covered by the aggregate indicator, …	Detailed documentation of the WGI, interactive tools for exploring the data, and full access to the underlying source data available at www.govindicators.org.The WGI are produced by Daniel Kaufmann (Natural Resource Governance Institute and Brookings Institution) and Aart Kraay (World Bank Development Research Group). Please cite Kaufmann, Daniel, Aart Kraay and Massimo Mastruzzi (2010). "The Wor…	Annual
GE.PER.RNK.UPPER	Government Effectiveness: Percentile Rank, Upper Bound of 90% Confidence Interval	Government Effectiveness captures perceptions of the quality of public services, the quality of the civil service and the degree of its independence from political pressures, the quality of policy formulation and implementation, and the credibility of the government's commitment to such policies. Percentile rank indicates the country's rank among all countries covered by the aggregate indicator, …	Detailed documentation of the WGI, interactive tools for exploring the data, and full access to the underlying source data available at www.govindicators.org.The WGI are produced by Daniel Kaufmann (Natural Resource Governance Institute and Brookings Institution) and Aart Kraay (World Bank Development Research Group). Please cite Kaufmann, Daniel, Aart Kraay and Massimo Mastruzzi (2010). "The Wor…	Annual
GE.STD.ERR	Government Effectiveness: Standard Error	Government Effectiveness captures perceptions of the quality of public services, the quality of the civil service and the degree of its independence from political pressures, the quality of policy formulation and implementation, and the credibility of the government's commitment to such policies. Standard error indicates the precision of the estimate of governance. Larger values of the standard e…	Detailed documentation of the WGI, interactive tools for exploring the data, and full access to the underlying source data available at www.govindicators.org.The WGI are produced by Daniel Kaufmann (Natural Resource Governance Institute and Brookings Institution) and Aart Kraay (World Bank Development Research Group). Please cite Kaufmann, Daniel, Aart Kraay and Massimo Mastruzzi (2010). "The Wor…	Annual
PV.EST	Political Stability and Absence of Violence/Terrorism: Estimate	Political Stability and Absence of Violence/Terrorism measures perceptions of the likelihood of political instability and/or politically-motivated violence, including terrorism. Estimate gives the country's score on the aggregate indicator, in units of a standard normal distribution, i.e. ranging from approximately -2.5 to 2.5.	Detailed documentation of the WGI, interactive tools for exploring the data, and full access to the underlying source data available at www.govindicators.org.The WGI are produced by Daniel Kaufmann (Natural Resource Governance Institute and Brookings Institution) and Aart Kraay (World Bank Development Research Group). Please cite Kaufmann, Daniel, Aart Kraay and Massimo Mastruzzi (2010). "The Wor…	Annual
PV.NO.SRC	Political Stability and Absence of Violence/Terrorism: Number of Sources	Political Stability and Absence of Violence/Terrorism measures perceptions of the likelihood of political instability and/or politically-motivated violence, including terrorism. Number of sources indicates the number of underlying data sources on which the aggregate estimate is based.	Detailed documentation of the WGI, interactive tools for exploring the data, and full access to the underlying source data available at www.govindicators.org.The WGI are produced by Daniel Kaufmann (Natural Resource Governance Institute and Brookings Institution) and Aart Kraay (World Bank Development Research Group). Please cite Kaufmann, Daniel, Aart Kraay and Massimo Mastruzzi (2010). "The Wor…	Annual
PV.PER.RNK	Political Stability and Absence of Violence/Terrorism: Percentile Rank	Political Stability and Absence of Violence/Terrorism measures perceptions of the likelihood of political instability and/or politically-motivated violence, including terrorism. Percentile rank indicates the country's rank among all countries covered by the aggregate indicator, with 0 corresponding to lowest rank, and 100 to highest rank. Percentile ranks have been adjusted to correct for changes…	Detailed documentation of the WGI, interactive tools for exploring the data, and full access to the underlying source data available at www.govindicators.org.The WGI are produced by Daniel Kaufmann (Natural Resource Governance Institute and Brookings Institution) and Aart Kraay (World Bank Development Research Group). Please cite Kaufmann, Daniel, Aart Kraay and Massimo Mastruzzi (2010). "The Wor…	Annual
PV.PER.RNK.LOWER	Political Stability and Absence of Violence/Terrorism: Percentile Rank, Lower Bound of 90% Confidence Interval	Political Stability and Absence of Violence/Terrorism measures perceptions of the likelihood of political instability and/or politically-motivated violence, including terrorism. Percentile rank indicates the country's rank among all countries covered by the aggregate indicator, with 0 corresponding to lowest rank, and 100 to highest rank. Percentile ranks have been adjusted to correct for changes…	Detailed documentation of the WGI, interactive tools for exploring the data, and full access to the underlying source data available at www.govindicators.org.The WGI are produced by Daniel Kaufmann (Natural Resource Governance Institute and Brookings Institution) and Aart Kraay (World Bank Development Research Group). Please cite Kaufmann, Daniel, Aart Kraay and Massimo Mastruzzi (2010). "The Wor…	Annual
PV.PER.RNK.UPPER	Political Stability and Absence of Violence/Terrorism: Percentile Rank, Upper Bound of 90% Confidence Interval	Political Stability and Absence of Violence/Terrorism measures perceptions of the likelihood of political instability and/or politically-motivated violence, including terrorism. Percentile rank indicates the country's rank among all countries covered by the aggregate indicator, with 0 corresponding to lowest rank, and 100 to highest rank. Percentile ranks have been adjusted to correct for changes…	Detailed documentation of the WGI, interactive tools for exploring the data, and full access to the underlying source data available at www.govindicators.org.The WGI are produced by Daniel Kaufmann (Natural Resource Governance Institute and Brookings Institution) and Aart Kraay (World Bank Development Research Group). Please cite Kaufmann, Daniel, Aart Kraay and Massimo Mastruzzi (2010). "The Wor…	Annual
PV.STD.ERR	Political Stability and Absence of Violence/Terrorism: Standard Error	Political Stability and Absence of Violence/Terrorism measures perceptions of the likelihood of political instability and/or politically-motivated violence, including terrorism. Standard error indicates the precision of the estimate of governance. Larger values of the standard error indicate less precise estimates. A 90 percent confidence interval for the governance estimate is given by the estim…	Detailed documentation of the WGI, interactive tools for exploring the data, and full access to the underlying source data available at www.govindicators.org.The WGI are produced by Daniel Kaufmann (Natural Resource Governance Institute and Brookings Institution) and Aart Kraay (World Bank Development Research Group). Please cite Kaufmann, Daniel, Aart Kraay and Massimo Mastruzzi (2010). "The Wor…	Annual
RQ.EST	Regulatory Quality: Estimate	Regulatory Quality captures perceptions of the ability of the government to formulate and implement sound policies and regulations that permit and promote private sector development. Estimate gives the country's score on the aggregate indicator, in units of a standard normal distribution, i.e. ranging from approximately -2.5 to 2.5.	Detailed documentation of the WGI, interactive tools for exploring the data, and full access to the underlying source data available at www.govindicators.org.The WGI are produced by Daniel Kaufmann (Natural Resource Governance Institute and Brookings Institution) and Aart Kraay (World Bank Development Research Group). Please cite Kaufmann, Daniel, Aart Kraay and Massimo Mastruzzi (2010). "The Wor…	Annual
RQ.NO.SRC	Regulatory Quality: Number of Sources	Regulatory Quality captures perceptions of the ability of the government to formulate and implement sound policies and regulations that permit and promote private sector development. umber of sources indicates the number of underlying data sources on which the aggregate estimate is based.	Detailed documentation of the WGI, interactive tools for exploring the data, and full access to the underlying source data available at www.govindicators.org.The WGI are produced by Daniel Kaufmann (Natural Resource Governance Institute and Brookings Institution) and Aart Kraay (World Bank Development Research Group). Please cite Kaufmann, Daniel, Aart Kraay and Massimo Mastruzzi (2010). "The Wor…	Annual
RQ.PER.RNK	Regulatory Quality: Percentile Rank	Regulatory Quality captures perceptions of the ability of the government to formulate and implement sound policies and regulations that permit and promote private sector development. Percentile rank indicates the country's rank among all countries covered by the aggregate indicator, with 0 corresponding to lowest rank, and 100 to highest rank. Percentile ranks have been adjusted to correct for ch…	Detailed documentation of the WGI, interactive tools for exploring the data, and full access to the underlying source data available at www.govindicators.org.The WGI are produced by Daniel Kaufmann (Natural Resource Governance Institute and Brookings Institution) and Aart Kraay (World Bank Development Research Group). Please cite Kaufmann, Daniel, Aart Kraay and Massimo Mastruzzi (2010). "The Wor…	Annual
RQ.PER.RNK.LOWER	Regulatory Quality: Percentile Rank, Lower Bound of 90% Confidence Interval	Regulatory Quality captures perceptions of the ability of the government to formulate and implement sound policies and regulations that permit and promote private sector development. Percentile rank indicates the country's rank among all countries covered by the aggregate indicator, with 0 corresponding to lowest rank, and 100 to highest rank. Percentile ranks have been adjusted to correct for ch…	Detailed documentation of the WGI, interactive tools for exploring the data, and full access to the underlying source data available at www.govindicators.org.The WGI are produced by Daniel Kaufmann (Natural Resource Governance Institute and Brookings Institution) and Aart Kraay (World Bank Development Research Group). Please cite Kaufmann, Daniel, Aart Kraay and Massimo Mastruzzi (2010). "The Wor…	Annual
RQ.PER.RNK.UPPER	Regulatory Quality: Percentile Rank, Upper Bound of 90% Confidence Interval	Regulatory Quality captures perceptions of the ability of the government to formulate and implement sound policies and regulations that permit and promote private sector development. Percentile rank indicates the country's rank among all countries covered by the aggregate indicator, with 0 corresponding to lowest rank, and 100 to highest rank. Percentile ranks have been adjusted to correct for ch…	Detailed documentation of the WGI, interactive tools for exploring the data, and full access to the underlying source data available at www.govindicators.org.The WGI are produced by Daniel Kaufmann (Natural Resource Governance Institute and Brookings Institution) and Aart Kraay (World Bank Development Research Group). Please cite Kaufmann, Daniel, Aart Kraay and Massimo Mastruzzi (2010). "The Wor…	Annual
RQ.STD.ERR	Regulatory Quality: Standard Error	Regulatory Quality captures perceptions of the ability of the government to formulate and implement sound policies and regulations that permit and promote private sector development. Standard error indicates the precision of the estimate of governance. Larger values of the standard error indicate less precise estimates. A 90 percent confidence interval for the governance estimate is given by the …	Detailed documentation of the WGI, interactive tools for exploring the data, and full access to the underlying source data available at www.govindicators.org.The WGI are produced by Daniel Kaufmann (Natural Resource Governance Institute and Brookings Institution) and Aart Kraay (World Bank Development Research Group). Please cite Kaufmann, Daniel, Aart Kraay and Massimo Mastruzzi (2010). "The Wor…	Annual
RL.EST	Rule of Law: Estimate	Rule of Law captures perceptions of the extent to which agents have confidence in and abide by the rules of society, and in particular the quality of contract enforcement, property rights, the police, and the courts, as well as the likelihood of crime and violence. Estimate gives the country's score on the aggregate indicator, in units of a standard normal distribution, i.e. ranging from approxim…	Detailed documentation of the WGI, interactive tools for exploring the data, and full access to the underlying source data available at www.govindicators.org.The WGI are produced by Daniel Kaufmann (Natural Resource Governance Institute and Brookings Institution) and Aart Kraay (World Bank Development Research Group). Please cite Kaufmann, Daniel, Aart Kraay and Massimo Mastruzzi (2010). "The Wor…	Annual
RL.NO.SRC	Rule of Law: Number of Sources	Rule of Law captures perceptions of the extent to which agents have confidence in and abide by the rules of society, and in particular the quality of contract enforcement, property rights, the police, and the courts, as well as the likelihood of crime and violence. Number of sources indicates the number of underlying data sources on which the aggregate estimate is based.	Detailed documentation of the WGI, interactive tools for exploring the data, and full access to the underlying source data available at www.govindicators.org.The WGI are produced by Daniel Kaufmann (Natural Resource Governance Institute and Brookings Institution) and Aart Kraay (World Bank Development Research Group). Please cite Kaufmann, Daniel, Aart Kraay and Massimo Mastruzzi (2010). "The Wor…	Annual
RL.PER.RNK	Rule of Law: Percentile Rank	Rule of Law captures perceptions of the extent to which agents have confidence in and abide by the rules of society, and in particular the quality of contract enforcement, property rights, the police, and the courts, as well as the likelihood of crime and violence. Percentile rank indicates the country's rank among all countries covered by the aggregate indicator, with 0 corresponding to lowest r…	Detailed documentation of the WGI, interactive tools for exploring the data, and full access to the underlying source data available at www.govindicators.org.The WGI are produced by Daniel Kaufmann (Natural Resource Governance Institute and Brookings Institution) and Aart Kraay (World Bank Development Research Group). Please cite Kaufmann, Daniel, Aart Kraay and Massimo Mastruzzi (2010). "The Wor…	Annual
RL.PER.RNK.LOWER	Rule of Law: Percentile Rank, Lower Bound of 90% Confidence Interval	Rule of Law captures perceptions of the extent to which agents have confidence in and abide by the rules of society, and in particular the quality of contract enforcement, property rights, the police, and the courts, as well as the likelihood of crime and violence. Percentile rank indicates the country's rank among all countries covered by the aggregate indicator, with 0 corresponding to lowest r…	Detailed documentation of the WGI, interactive tools for exploring the data, and full access to the underlying source data available at www.govindicators.org.The WGI are produced by Daniel Kaufmann (Natural Resource Governance Institute and Brookings Institution) and Aart Kraay (World Bank Development Research Group). Please cite Kaufmann, Daniel, Aart Kraay and Massimo Mastruzzi (2010). "The Wor…	Annual
RL.PER.RNK.UPPER	Rule of Law: Percentile Rank, Upper Bound of 90% Confidence Interval	Rule of Law captures perceptions of the extent to which agents have confidence in and abide by the rules of society, and in particular the quality of contract enforcement, property rights, the police, and the courts, as well as the likelihood of crime and violence. Percentile rank indicates the country's rank among all countries covered by the aggregate indicator, with 0 corresponding to lowest r…	Detailed documentation of the WGI, interactive tools for exploring the data, and full access to the underlying source data available at www.govindicators.org.The WGI are produced by Daniel Kaufmann (Natural Resource Governance Institute and Brookings Institution) and Aart Kraay (World Bank Development Research Group). Please cite Kaufmann, Daniel, Aart Kraay and Massimo Mastruzzi (2010). "The Wor…	Annual
RL.STD.ERR	Rule of Law: Standard Error	Rule of Law captures perceptions of the extent to which agents have confidence in and abide by the rules of society, and in particular the quality of contract enforcement, property rights, the police, and the courts, as well as the likelihood of crime and violence. Standard error indicates the precision of the estimate of governance. Larger values of the standard error indicate less precise estim…	Detailed documentation of the WGI, interactive tools for exploring the data, and full access to the underlying source data available at www.govindicators.org.The WGI are produced by Daniel Kaufmann (Natural Resource Governance Institute and Brookings Institution) and Aart Kraay (World Bank Development Research Group). Please cite Kaufmann, Daniel, Aart Kraay and Massimo Mastruzzi (2010). "The Wor…	Annual
VA.EST	Voice and Accountability: Estimate	Voice and Accountability captures perceptions of the extent to which a country's citizens are able to participate in selecting their government, as well as freedom of expression, freedom of association, and a free media. Estimate gives the country's score on the aggregate indicator, in units of a standard normal distribution, i.e. ranging from approximately -2.5 to 2.5.	Detailed documentation of the WGI, interactive tools for exploring the data, and full access to the underlying source data available at www.govindicators.org.The WGI are produced by Daniel Kaufmann (Natural Resource Governance Institute and Brookings Institution) and Aart Kraay (World Bank Development Research Group). Please cite Kaufmann, Daniel, Aart Kraay and Massimo Mastruzzi (2010). "The Wor…	Annual
VA.NO.SRC	Voice and Accountability: Number of Sources	Voice and Accountability captures perceptions of the extent to which a country's citizens are able to participate in selecting their government, as well as freedom of expression, freedom of association, and a free media. Number of sources indicates the number of underlying data sources on which the aggregate estimate is based.	Detailed documentation of the WGI, interactive tools for exploring the data, and full access to the underlying source data available at www.govindicators.org.The WGI are produced by Daniel Kaufmann (Natural Resource Governance Institute and Brookings Institution) and Aart Kraay (World Bank Development Research Group). Please cite Kaufmann, Daniel, Aart Kraay and Massimo Mastruzzi (2010). "The Wor…	Annual
VA.PER.RNK	Voice and Accountability: Percentile Rank	Voice and Accountability captures perceptions of the extent to which a country's citizens are able to participate in selecting their government, as well as freedom of expression, freedom of association, and a free media. Percentile rank indicates the country's rank among all countries covered by the aggregate indicator, with 0 corresponding to lowest rank, and 100 to highest rank. Percentile rank…	Detailed documentation of the WGI, interactive tools for exploring the data, and full access to the underlying source data available at www.govindicators.org.The WGI are produced by Daniel Kaufmann (Natural Resource Governance Institute and Brookings Institution) and Aart Kraay (World Bank Development Research Group). Please cite Kaufmann, Daniel, Aart Kraay and Massimo Mastruzzi (2010). "The Wor…	Annual
VA.PER.RNK.LOWER	Voice and Accountability: Percentile Rank, Lower Bound of 90% Confidence Interval	Voice and Accountability captures perceptions of the extent to which a country's citizens are able to participate in selecting their government, as well as freedom of expression, freedom of association, and a free media. Percentile rank indicates the country's rank among all countries covered by the aggregate indicator, with 0 corresponding to lowest rank, and 100 to highest rank. Percentile rank…	Detailed documentation of the WGI, interactive tools for exploring the data, and full access to the underlying source data available at www.govindicators.org.The WGI are produced by Daniel Kaufmann (Natural Resource Governance Institute and Brookings Institution) and Aart Kraay (World Bank Development Research Group). Please cite Kaufmann, Daniel, Aart Kraay and Massimo Mastruzzi (2010). "The Wor…	Annual
VA.PER.RNK.UPPER	Voice and Accountability: Percentile Rank, Upper Bound of 90% Confidence Interval	Voice and Accountability captures perceptions of the extent to which a country's citizens are able to participate in selecting their government, as well as freedom of expression, freedom of association, and a free media. Percentile rank indicates the country's rank among all countries covered by the aggregate indicator, with 0 corresponding to lowest rank, and 100 to highest rank. Percentile rank…	Detailed documentation of the WGI, interactive tools for exploring the data, and full access to the underlying source data available at www.govindicators.org.The WGI are produced by Daniel Kaufmann (Natural Resource Governance Institute and Brookings Institution) and Aart Kraay (World Bank Development Research Group). Please cite Kaufmann, Daniel, Aart Kraay and Massimo Mastruzzi (2010). "The Wor…	Annual
VA.STD.ERR	Voice and Accountability: Standard Error	Voice and Accountability captures perceptions of the extent to which a country's citizens are able to participate in selecting their government, as well as freedom of expression, freedom of association, and a free media. Standard error indicates the precision of the estimate of governance. Larger values of the standard error indicate less precise estimates. A 90 percent confidence interval for th…
